# Supplementary material for: Effects of Acute and Chronic Resistance Exercise on the Skeletal Muscle Metabolome
Source: Research Square preprint supplement (doi:10.21203/rs.3.rs-1072544/v1), 2021-11-22
Supplement: Supplementary file 1 [file 23a222e665dc30c5fa363a62.xlsx]

## Sheet: Legend
Supplementary Material
Supplementary Table S1: Characteristics of participants
Supplementary Table S2: Full list of 645 measured metabolites; *indicate a compound that has not been confirmed based on an authentic standard;
Supplementary Table S3: Response to acute exercise; results from paired t-test, comparing metabolite levels (log2-transformed) at 45 min after the first bout of (unaccustomed) resistance exercise.
Supplementary Table S4: Response to chronic training; results from paired t-test, comparing metabolite levels (log2-transformed) at 45 min after the last bout of resistance exercise after a 5-week RE training to levels at 45 min after the first (unaccustomed) bout of resistance exercise.

## Sheet: Table S1
Supplementary Table S1: Characteristics of participants
Participants	Fiber type distribution (%)		Type I myofiber diameter (μm)			Type II myofiber diameter (μm)			Sex	Age	Height (m)	Weight (kg)
	Type 1	Type II	Rest	Acute exercise	Chronic training	Rest	Acute exercise	Chronic training
1	45.6	54.4	69.8112	86.6468	96.3228	83.534	93.03	105.92	M	26	1.68	64.6
2	33.2	66.8	84.479	79.5519	90.266	94.8185	92.8837	99.9732	M	30	1.84	89
3	49.4	50.6	80.1228	78.1104	85.3464	99.382	93.1686	102.515	M	21	1.83	84.2
4	28.4	71.6	85.4016	92.8091	97.3526	94.3355	108.958	115.078	M	23	1.92	89
5	62	38	86.5912	86.9261	95.4594	111.251	112.851	123.608	M	20	1.9	90
6	45.6	54.4	77.5814	75.0068	87.7935	99.6468	101.41	118.077	M	21	1.8	70.2

## Sheet: Table S2
Supplementary Table S2: Full list of 645 measured metabolites; *indicate a compound that has not been confirmed based on an authentic standard;
Metabolite name	Pathway sort order	Metabolite class (SUPER_PATHWAY)	Metabolic pathway (SUB_PATHWAY)	Metabolon compound ID	Metabolon chemical ID	Platform	Retention index	m/z	CAS	PUBCHEM	CHEMSPIDER	KEGG	HMDB	% Missingness
(12 or 13)-methylmyristate (a15:0 or i15:0)	1324	Lipid	Fatty Acid, Branched	38293	100002344	LC/MS Neg	5499	241.217	2485-71-4	151014	133106			11.1111
(14 or 15)-methylpalmitate (a17:0 or i17:0)	1327	Lipid	Fatty Acid, Branched	38768	100002945	LC/MS Neg	5695	269.249		17903417				0
(16 or 17)-methylstearate (a19:0 or i19:0)	1331	Lipid	Fatty Acid, Branched	38296	100002356	LC/MS Neg	5993	297.28	2724-59-6	3083779	2340933		HMDB37397	0
1,2,3-benzenetriol sulfate (2)	4942	Xenobiotics	Chemical	48762	100006374	LC/MS Neg	1709	204.981						5.55556
1,3-dimethylurate	3844	Xenobiotics	Xanthine Metabolism	32391	100001106	LC/MS Neg	1671.4	195.052	944-73-0	70346	63527		HMDB01857	11.1111
1,5-anhydroglucitol (1,5-AG)	955	Carbohydrate	Glycolysis, Gluconeogenesis, and Pyruvate Metabolism	20675	100000580	LC/MS Neg	802	163.061	154-58-5	64960		C07326	HMDB02712	0
1,7-dimethylurate	3845	Xenobiotics	Xanthine Metabolism	34400	100001399	LC/MS Neg	1578.6	195.052	33868-03-0	91611	82720	C16356	HMDB11103	0
1-(1-enyl-oleoyl)-GPE (P-18:1)*	2337	Lipid	Lysoplasmalogen	44621	100005372	LC/MS Neg	6250	462.299						0
1-(1-enyl-palmitoyl)-GPC (P-16:0)*	2334	Lipid	Lysoplasmalogen	52474	100002875	LC/MS Neg	6300	554.346		10917802	9093054		HMDB10407	0
1-(1-enyl-palmitoyl)-GPE (P-16:0)*	2335	Lipid	Lysoplasmalogen	39270	100003000	LC/MS Neg	6285	436.283			10471193			0
1-(1-enyl-stearoyl)-GPE (P-18:0)*	2339	Lipid	Lysoplasmalogen	39271	100003001	LC/MS Neg	6500	464.315						0
1-arachidonoyl-GPC (20:4n6)*	2129	Lipid	Lysophospholipid	34061	100001551	LC/MS Neg	6074	618.341			21403155	C05208	HMDB10395	0
1-arachidonoyl-GPE (20:4n6)*	2172	Lipid	Lysophospholipid	35186	100001571	LC/MS Neg	5874	500.278		42607465	21403171		HMDB11517	0
1-arachidonoyl-GPI (20:4)*	2210	Lipid	Lysophospholipid	34214	100001654	LC/MS Neg	5482	619.289					HMDB61690	0
1-arachidonylglycerol (20:4)	2363	Lipid	Monoacylglycerol	34397	100001433	LC/MS Neg	6250	303.233	35474-99-8	5282281	4445452	C13857	HMDB11549	38.8889
1-carboxyethylisoleucine	299	Amino Acid	Leucine, Isoleucine and Valine Metabolism	62558	100020427	LC/MS Neg	2628	202.108						33.3333
1-carboxyethylleucine	263	Amino Acid	Leucine, Isoleucine and Valine Metabolism	62559	100020425	LC/MS Neg	2663	202.108						5.55556
1-carboxyethylphenylalanine	122	Amino Acid	Phenylalanine Metabolism	62566	100020419	LC/MS Neg	2844	236.093			19276386			0
1-carboxyethylvaline	321	Amino Acid	Leucine, Isoleucine and Valine Metabolism	62562	100020423	LC/MS Neg	2008	188.093						0
1-linoleoyl-GPC (18:2)	2111	Lipid	Lysophospholipid	34419	100001395	LC/MS Neg	6160	594.341		11988421	10160888	C04100	HMDB10386	0
1-linoleoyl-GPE (18:2)*	2161	Lipid	Lysophospholipid	32635	100001570	LC/MS Neg	5900	476.278		52925130	21403170		HMDB11507	0
1-linoleoyl-GPG (18:2)*	2198	Lipid	Lysophospholipid	54885	100009227	LC/MS Neg	5516	507.273						0
1-linoleoyl-GPI (18:2)*	2206	Lipid	Lysophospholipid	36594	100001778	LC/MS Neg	5494	595.289						0
1-linoleoylglycerol (18:2)	2357	Lipid	Monoacylglycerol	27447	100001040	LC/MS Neg	6477	279.233	2277-28-3	5283469	4446589			11.1111
1-methylhistidine	66	Amino Acid	Histidine Metabolism	30460	100001051	LC/MS Neg	1227	168.078	332-80-9	92105	83153	C01152	HMDB00001	0
1-methylurate	3842	Xenobiotics	Xanthine Metabolism	34395	100001400	LC/MS Pos	1860.5	183.051	708-79-2	69726	62926	C16359	HMDB03099	0
1-methylxanthine	3848	Xenobiotics	Xanthine Metabolism	34389	100001405	LC/MS Pos	2004.6	167.056	6136-37-4	80220	72464	C16358	HMDB10738	0
1-myristoylglycerol (14:0)	2349	Lipid	Monoacylglycerol	35625	100001618	LC/MS Neg	6353.3	227.202	75685-84-6	79050	71382	C01885	HMDB11561	16.6667
1-oleoyl-GPC (18:1)	2108	Lipid	Lysophospholipid	48258	100001272	LC/MS Neg	6250	596.357	19420-56-5	16081932	17240641		HMDB02815	0
1-oleoyl-GPE (18:1)	2159	Lipid	Lysophospholipid	35628	100001569	LC/MS Neg	6125.1	478.294	89576-29-4	9547071	7826021		HMDB11506	0
1-oleoyl-GPG (18:1)*	2196	Lipid	Lysophospholipid	45968	100005716	LC/MS Neg	5610	509.288			34999689			0
1-oleoyl-GPI (18:1)*	2204	Lipid	Lysophospholipid	36602	100001777	LC/MS Neg	5599	597.305						0
1-oleoylglycerol (18:1)	2356	Lipid	Monoacylglycerol	21184	100000924	LC/MS Neg	6650	281.249	111-03-5	5283468	4446588		HMDB11567	11.1111
1-palmitoleoyl-GPC (16:1)*	2100	Lipid	Lysophospholipid	33230	100001511	LC/MS Pos	5525	494.324		24779461	21403152		HMDB10383	0
1-palmitoyl-GPA (16:0)	2083	Lipid	Lysophospholipid	34428	100001445	LC/MS Neg	5600	409.236	17618-08-5	6419701	4925335	C04036	HMDB00327	0
1-palmitoyl-GPC (16:0)	2098	Lipid	Lysophospholipid	33955	100001263	LC/MS Pos	5670	496.34	17364-16-8	86554	78064		HMDB10382	0
1-palmitoyl-GPE (16:0)	2150	Lipid	Lysophospholipid	35631	100001567	LC/MS Pos	5654.1	454.293	53862-35-4	9547069	7826019		HMDB11503	22.2222
1-stearoyl-GPC (18:0)	2106	Lipid	Lysophospholipid	33961	100001271	LC/MS Neg	6870	598.373	19420-57-6	497299	435389		HMDB10384	0
1-stearoyl-GPE (18:0)	2157	Lipid	Lysophospholipid	42398	100001461	LC/MS Neg	6514	480.31	69747-55-3	9547068	7826018		HMDB11130	0
1-stearoyl-GPG (18:0)	2194	Lipid	Lysophospholipid	34437	100001462	LC/MS Neg	5816	511.304			21403138			50
1-stearoyl-GPI (18:0)	2202	Lipid	Lysophospholipid	19324	100000656	LC/MS Neg	5794	599.32	796963-93-4		21403067		HMDB61696	0
1-stearoyl-GPS (18:0)*	2186	Lipid	Lysophospholipid	45966	100004327	LC/MS Neg	5800	524.299		9547101	7826051			0
10-heptadecenoate (17:1n7)	1216	Lipid	Long Chain Fatty Acid	33971	100001278	LC/MS Neg	5555	267.233	29743-97-3	5312435	4471860		HMDB60038	0
10-nonadecenoate (19:1n9)	1228	Lipid	Long Chain Fatty Acid	33972	100001277	LC/MS Neg	5780	295.264	73033-09-7	5312513	4471938		HMDB13622	0
13-HODE + 9-HODE	1597	Lipid	Fatty Acid, Monohydroxy	37752	100002196	LC/MS Neg	5275	295.228		43013				0
2-aminoadipate	105	Amino Acid	Lysine Metabolism	6146	381	LC/MS Pos	793.3	162.076	542-32-5;1118-90-7	469	456	C00956	HMDB00510	0
2-aminoheptanoate	1425	Lipid	Fatty Acid, Amino	43761	100004542	LC/MS Pos	2530	146.118	1115-90-8	227939	198338			0
2-aminooctanoate	1430	Lipid	Fatty Acid, Amino	43343	100004227	LC/MS Pos	3355	160.133	644-90-6	69522	62727		HMDB00991	0
2-aminophenol sulfate	4841	Xenobiotics	Chemical	43266	100004322	LC/MS Neg	1677	188.002		181670	158022		HMDB61116	0
2-arachidonoylglycerol (20:4)	2373	Lipid	Monoacylglycerol	19266	100000584	LC/MS Neg	6170	303.233	53847-30-6	5282280	4445451	C13856	HMDB04666	50
2-hydroxy-3-methylvalerate	324	Amino Acid	Leucine, Isoleucine and Valine Metabolism	36746	100001541	LC/MS Neg	1800	131.071	488-15-3	164623	144317		HMDB00317	0
2-hydroxyacetaminophen sulfate*	4413	Xenobiotics	Drug - Analgesics, Anesthetics	33173	100001791	LC/MS Neg	1674	246.008		86290013	34448632			88.8889
2-hydroxyheptanoate*	1559	Lipid	Fatty Acid, Monohydroxy	61827	100019960	LC/MS Neg	2900	145.087		2750949	2032206			0
2-hydroxyhippurate (salicylurate)	3752	Xenobiotics	Benzoate Metabolism	18281	1869	LC/MS Neg	2184	194.046	487-54-7	10253	9835	C07588	HMDB00840	72.2222
2-hydroxyoctanoate	1560	Lipid	Fatty Acid, Monohydroxy	22036	100000743	LC/MS Neg	3736.8	159.103	617-73-2	94180	84994		HMDB02264	0
2-hydroxyoleate	1565	Lipid	Fatty Acid, Monohydroxy	54920	100010866	LC/MS Neg	5560	297.244	56472-29-8	9796304	7972070			0
2-hydroxypalmitate	1564	Lipid	Fatty Acid, Monohydroxy	35675	100001579	LC/MS Neg	5511.2	271.228	764-67-0	92836	83805		HMDB31057	0
2-hydroxystearate	1566	Lipid	Fatty Acid, Monohydroxy	17945	1239	LC/MS Neg	5695	299.259	629-22-1	69417	62625	C03045		0
2-methoxyacetaminophen sulfate*	4414	Xenobiotics	Drug - Analgesics, Anesthetics	47031	100001793	LC/MS Neg	1949	260.023		86290014	34448633			88.8889
2-methylbutyrylcarnitine (C5)	303	Amino Acid	Leucine, Isoleucine and Valine Metabolism	45095	100001509	LC/MS Pos	2465	246.17	31023-25-3	6426901	4932320		HMDB00378	0
2-methylmalonylcarnitine (C4-DC)	1182	Lipid	Fatty Acid Synthesis	35482	100001596	LC/MS Pos	1552.7	262.129	149181-64-6	53481628	21403178		HMDB13133	0
2-oleoylglycerol (18:1)	2371	Lipid	Monoacylglycerol	21232	100000943	LC/MS Neg	6500	281.249	3443-84-3	5319879	4478086		HMDB11537	5.55556
2-palmitoleoyl-GPC (16:1)*	2101	Lipid	Lysophospholipid	35819	100001561	LC/MS Pos	5490	494.324			21403164		HMDB10383	5.55556
2-palmitoyl-GPC (16:0)*	2099	Lipid	Lysophospholipid	35253	100001562	LC/MS Neg	6215	570.341		15061532	21403165		HMDB61702	0
2-palmitoylglycerol (16:0)	2368	Lipid	Monoacylglycerol	33419	100001048	LC/MS Neg	6400	255.233	23470-00-0	123409	110006		HMDB11533	0
2-stearoyl-GPC (18:0)*	2107	Lipid	Lysophospholipid	35255	100001555	LC/MS Pos	5777	524.371		10208382	8383879			0
2-stearoyl-GPE (18:0)*	2158	Lipid	Lysophospholipid	41220	100003901	LC/MS Neg	6350	480.31			24769218		HMDB11129	0
3'-dephospho-CoA-glutathione*	460	Amino Acid	Glutathione Metabolism	62807	100020899	LC/MS Neg	1690	495.101						0
3'-dephosphocoenzyme A	3645	Cofactors and Vitamins	Pantothenate and CoA Metabolism	18289	100000138	LC/MS Neg	2013	686.142	3633-59-8	444485	392407	C00882	HMDB01373	0
3,4-methyleneheptanoylcarnitine	1505	Lipid	Fatty Acid Metabolism(Acyl Carnitine)	52929	100009234	LC/MS Pos	3768	286.201						0
3-(4-hydroxyphenyl)lactate	150	Amino Acid	Tyrosine Metabolism	32197	240	LC/MS Neg	1379	181.051	6482-98-0	9378	9010	C03672	HMDB00755	0
3-(cystein-S-yl)acetaminophen*	4416	Xenobiotics	Drug - Analgesics, Anesthetics	34365	100001797	LC/MS Pos	1963	271.075		5233914	4403253			94.4444
3-carboxy-4-methyl-5-pentyl-2-furanpropionate (3-CMPFP)**	1383	Lipid	Fatty Acid, Dicarboxylate	61871	100020004	LC/MS Neg	4000	267.124		194501	168762			0
3-carboxy-4-methyl-5-propyl-2-furanpropanoate (CMPF)	1381	Lipid	Fatty Acid, Dicarboxylate	31787	100001178	LC/MS Neg	2800	239.092	86879-39-2	123979	110498		HMDB61112	0
3-formylindole	3969	Xenobiotics	Food Component/Plant	62863	100020219	LC/MS Neg	3709	144.045		10256	9838	C08493	HMDB29737	0
3-hydroxy-2-ethylpropionate	309	Amino Acid	Leucine, Isoleucine and Valine Metabolism	32397	100001170	LC/MS Neg	975	117.056	4374-62-3	188979	164207		HMDB00396	0
3-hydroxybutyrate (BHBA)	1541	Lipid	Ketone Bodies	542	254	LC/MS Neg	743.2	103.04	625-72-9	441	428	C01089	HMDB00357	11.1111
3-hydroxybutyrylcarnitine (1)	1477	Lipid	Fatty Acid Metabolism(Acyl Carnitine)	43264	100003926	LC/MS Pos	1477	248.149		53481617			HMDB13127	0
3-hydroxybutyrylcarnitine (2)	1478	Lipid	Fatty Acid Metabolism(Acyl Carnitine)	52984	100009271	LC/MS Pos	1372	248.149					HMDB13127	0
3-hydroxyhexanoate	1573	Lipid	Fatty Acid, Monohydroxy	53230	100006367	LC/MS Neg	1725	131.071	10191-24-9	151492	133518			0
3-hydroxyhexanoylcarnitine (1)	1482	Lipid	Fatty Acid Metabolism(Acyl Carnitine)	62557	100020825	LC/MS Pos	2206	276.181						0
3-hydroxyhippurate	3754	Xenobiotics	Benzoate Metabolism	39600	100002122	LC/MS Neg	1687	194.046	1637-75-8	450268	396603		HMDB06116	5.55556
3-hydroxyindolin-2-one	3978	Xenobiotics	Food Component/Plant	42561	100003823	LC/MS Pos	2645	132.044	61-71-2	6097	5872	C11130		0
3-hydroxyoctanoate	1574	Lipid	Fatty Acid, Monohydroxy	22001	100000773	LC/MS Neg	3446	159.103	88930-08-9	26613	24791		HMDB01954	0
3-hydroxyoleate*	1582	Lipid	Fatty Acid, Monohydroxy	61843	100019966	LC/MS Neg	5508	297.244						0
3-hydroxypyridine sulfate	4945	Xenobiotics	Chemical	48448	100006098	LC/MS Neg	1595.5	173.987	1955-23-3		16232314			0
3-hydroxystearate	1612	Lipid	Fatty Acid, Monohydroxy	52938	100008933	LC/MS Neg	5674	299.259	45261-96-9	5282907	4446034			0
3-indoxyl sulfate	254	Amino Acid	Tryptophan Metabolism	27672	100000467	LC/MS Neg	2222.2	212.002	2642-37-7	10258	9840		HMDB00682	0
3-methoxytyrosine	168	Amino Acid	Tyrosine Metabolism	12017	1342	LC/MS Pos	1771	212.092	300-48-1	1670	8948		HMDB01434	0
3-methyl catechol sulfate (1)	3784	Xenobiotics	Benzoate Metabolism	46165	100004112	LC/MS Neg	2790	203.002						0
3-methyl-2-oxobutyrate	323	Amino Acid	Leucine, Isoleucine and Valine Metabolism	44526	100000936	LC/MS Neg	1465	115.04	3715-29-5	49	48	C00141	HMDB00019	0
3-methyl-2-oxovalerate	300	Amino Acid	Leucine, Isoleucine and Valine Metabolism	15676	100000036	LC/MS Neg	2064.2	129.056	1460-34-0;51829-07-3	47	46	C00671	HMDB03736	0
3-methylglutarylcarnitine (1)	286	Amino Acid	Leucine, Isoleucine and Valine Metabolism	46547	100005849	LC/MS Pos	1870	290.16		128145	113619		HMDB00552	0
3-methylglutarylcarnitine (2)	287	Amino Acid	Leucine, Isoleucine and Valine Metabolism	46548	100005850	LC/MS Pos	1960	290.16		128145	113619		HMDB00552	0
3-methylhistidine	67	Amino Acid	Histidine Metabolism	15677	100000042	LC/MS Neg	906.3	168.078	368-16-1	64969	58494	C01152	HMDB00479	0
3-methylxanthine	3849	Xenobiotics	Xanthine Metabolism	32445	100001108	LC/MS Pos	1911.6	167.056	1076-22-8	70639	63805	C16357	HMDB01886	0
3-phenylpropionate (hydrocinnamate)	3836	Xenobiotics	Benzoate Metabolism	15749	100000010	LC/MS Neg	2860	149.061	501-52-0	107	10181339	C05629	HMDB00764	5.55556
3-phosphoglycerate	972	Carbohydrate	Glycolysis, Gluconeogenesis, and Pyruvate Metabolism	1414	132	LC/MS Neg	583	184.986	80731-10-8	724	10669764	C00597	HMDB00807	0
4-acetamidobutanoate	434	Amino Acid	Polyamine Metabolism	1558	1113	LC/MS Pos	1721	146.081	3025-96-5	18189	17180	C02946	HMDB03681	11.1111
4-acetamidophenol	4409	Xenobiotics	Drug - Analgesics, Anesthetics	12032	1383	LC/MS Neg	2173.7	150.056	103-90-2	1983	1906	C06804	HMDB01859	88.8889
4-acetamidophenylglucuronide	4412	Xenobiotics	Drug - Analgesics, Anesthetics	15736	100000043	LC/MS Neg	1400	326.088	120595-80-4	83944	3239926		HMDB10316	88.8889
4-acetaminophen sulfate	4411	Xenobiotics	Drug - Analgesics, Anesthetics	37475	2049	LC/MS Neg	1792	230.013	10066-90-7;32113-41-0	83939	75741	C06804	HMDB59911	83.3333
4-allylphenol sulfate	4235	Xenobiotics	Food Component/Plant	37181	100001868	LC/MS Neg	3805	213.023						0
4-ethylphenylsulfate	3798	Xenobiotics	Benzoate Metabolism	36099	100001756	LC/MS Neg	3580	201.023	123-07-9			C13637	HMDB62551	5.55556
4-guanidinobutanoate	439	Amino Acid	Guanidino and Acetamido Metabolism	15681	100000096	LC/MS Pos	1150	146.092	463-003;463-00-3	500	486	C01035	HMDB03464	0
4-hydroxy-nonenal-glutathione	459	Amino Acid	Glutathione Metabolism	48503	100006240	LC/MS Neg	3260.2	462.192	99927-70-5					5.55556
4-hydroxybenzoate	3772	Xenobiotics	Benzoate Metabolism	21133	100000862	LC/MS Neg	820	137.024	99-96-7	135	132	C00156	HMDB00500	27.7778
4-methyl-2-oxopentanoate	265	Amino Acid	Leucine, Isoleucine and Valine Metabolism	22116	100000551	LC/MS Neg	2170	129.056	816-66-0	70	69	C00233	HMDB00695	0
4-methylbenzenesulfonate	4935	Xenobiotics	Chemical	43592	100002390	LC/MS Neg	2350	171.012	104-15-4	6101	5876	C06677		0
4-methylcatechol sulfate	3786	Xenobiotics	Benzoate Metabolism	46146	100004111	LC/MS Neg	2665	203.002						0
4-nitrophenol	3793	Xenobiotics	Benzoate Metabolism	27675	100000742	LC/MS Neg	2220	138.02	100-02-7	980	955	C00870	HMDB01232	0
4-vinylphenol sulfate	3799	Xenobiotics	Benzoate Metabolism	36098	100001755	LC/MS Neg	3320	199.007	2628-17-3	6426766	4932200	C05627	HMDB62775	0
5,6-dihydrouridine	3541	Nucleotide	Pyrimidine Metabolism, Uracil containing	61833	100001425	LC/MS Neg	1119	245.078	1361384	94312	85115			0
5-methylthioadenosine (MTA)	429	Amino Acid	Polyamine Metabolism	1419	212	LC/MS Pos	2444.9	298.097	2457-80-9	439176	388321	C00170	HMDB01173	0
5-methyluridine (ribothymidine)	3543	Nucleotide	Pyrimidine Metabolism, Uracil containing	35136	100001446	LC/MS Neg	1778.1	257.078	1463-10-1	445408	393058		HMDB00884	0
5-oxoproline	451	Amino Acid	Glutathione Metabolism	1494	1021	LC/MS Neg	738.5	128.035	98-79-3	7405	7127	C01879	HMDB00267	0
5alpha-androstan-3beta,17beta-diol disulfate	2781	Lipid	Androgenic Steroids	37190	100001987	LC/MS Neg	3880	225.07	571-20-0	242332		C12525	HMDB00493	0
6-hydroxyindole sulfate	4955	Xenobiotics	Chemical	48698	100006260	LC/MS Neg	2498	212.002						0
6-oxopiperidine-2-carboxylate	114	Amino Acid	Lysine Metabolism	43231	100004499	LC/MS Pos	1826.6	144.066	34622-39-4	3014237	2282737		HMDB61705	0
6-phosphogluconate	981	Carbohydrate	Pentose Phosphate Pathway	15442	100000341	LC/MS Neg	583.9	275.017	921-62-0;53411-70-4	91493	82615	C00345	HMDB01316	0
7-alpha-hydroxy-3-oxo-4-cholestenoate (7-Hoca)	2628	Lipid	Sterol	36776	100001609	LC/MS Neg	5288.1	429.301	115538-85-7	3081085	2338765	C17337	HMDB12458	0
7-hydroxycholesterol (alpha or beta)	2661	Lipid	Sterol	47890	100005999	LC/MS Pos	6164	367.336		107722			HMDB06119	0
7-methylguanine	3507	Nucleotide	Purine Metabolism, Guanine containing	35114	100001456	LC/MS Pos	1395.6	166.072	578-76-7	11361	10883	C02242	HMDB00897	0
7-methylxanthine	3850	Xenobiotics	Xanthine Metabolism	34390	100001396	LC/MS Pos	1813.9	167.056	552-62-5	68374	61660	C16353	HMDB01991	0
Ac-Ser-Asp-Lys-Pro-OH	881	Peptide	Polypeptide	40707	100003761	LC/MS Pos	1760	488.235	127103-11-1	4409396	3610210			61.1111
acesulfame	4193	Xenobiotics	Food Component/Plant	48569	100006203	LC/MS Neg	1581	161.987	55589-62-3	36573	33607		HMDB33585	55.5556
acetyl CoA	1183	Lipid	Fatty Acid Metabolism	43840	1830	LC/MS Neg	1691	403.556	102029-73-2	444493	392413	C00024	HMDB01206	5.55556
acetylcarnitine (C2)	1475	Lipid	Fatty Acid Metabolism(Acyl Carnitine)	32198	100000802	LC/MS Pos	1166.9	204.123	5080-50-2	1	5406074	C02571	HMDB00201	0
acetylphosphate	1176	Energy	Oxidative Phosphorylation	15488	1211	LC/MS Neg	600	138.98	94249-01-1	186	181	C00227	HMDB01494	0
acisoga	425	Amino Acid	Polyamine Metabolism	43258	100004541	LC/MS Pos	2290	185.128	106692-36-8	129397	114601			0
adenine	3471	Nucleotide	Purine Metabolism, Adenine containing	554	880	LC/MS Neg	1680	134.047	73-24-5	190	185	C00147	HMDB00034	0
adenosine	3470	Nucleotide	Purine Metabolism, Adenine containing	555	798	LC/MS Pos	1625.3	268.104	58-61-7	60961	54923	C00212	HMDB00050	0
adenosine 2'-monophosphate (2'-AMP)	3465	Nucleotide	Purine Metabolism, Adenine containing	36815	100001694	LC/MS Neg	1497.7	346.056	130-49-4	94136		C00946	HMDB11617	0
adenosine 3',5'-cyclic monophosphate (cAMP)	3466	Nucleotide	Purine Metabolism, Adenine containing	2831	207	LC/MS Neg	1952.2	328.045	60-92-4	6076	268	C00575	HMDB00058	0
adenosine 3',5'-diphosphate	3468	Nucleotide	Purine Metabolism, Adenine containing	15691	1214	LC/MS Neg	575	426.022	75431-54-8	159296	19951095	C00054	HMDB00061	0
adenosine 3'-monophosphate (3'-AMP)	3464	Nucleotide	Purine Metabolism, Adenine containing	35142	100001449	LC/MS Neg	1245	346.056	84-21-9	41211	10463793	C01367	HMDB03540	0
adenosine 5'-diphosphate (ADP)	3462	Nucleotide	Purine Metabolism, Adenine containing	3108	208	LC/MS Neg	680	426.022	20398-34-9	6022	5800	C00008	HMDB01341	0
adenosine 5'-diphosphoribose (ADP-ribose)	3636	Cofactors and Vitamins	Nicotinate and Nicotinamide Metabolism	558	215	LC/MS Neg	920	558.064	68414-18-6	192	3674071	C00301	HMDB01178	0
adenosine 5'-monophosphate (AMP)	3463	Nucleotide	Purine Metabolism, Adenine containing	32342	209	LC/MS Neg	822	346.056	149022-20-8	6083	10239183	C00020	HMDB00045	0
adrenate (22:4n6)	1266	Lipid	Polyunsaturated Fatty Acid (n3 and n6)	32980	100001193	LC/MS Neg	5678	331.264	2091-25-0	5497181	4445971	C16527	HMDB02226	0
AICA ribonucleotide	3441	Nucleotide	Purine Metabolism, (Hypo)Xanthine/Inosine containing	38325	216	LC/MS Pos	1120	339.07	3031-94-5	65110	195	C04677	HMDB01517	0
alanine	28	Amino Acid	Alanine and Aspartate Metabolism	1126	811	LC/MS Neg	682	88.0404	56-41-7	5950	5735	C00041	HMDB00161	0
alanylleucine	494	Peptide	Dipeptide	37093	100001890	LC/MS Pos	2165	203.139	1638-60-4	259583	227831		HMDB28691	0
alpha-glutamylisoleucine*	509	Peptide	Dipeptide	62114	100009287	LC/MS Pos	2150	261.144			16568291			0
alpha-glutamylleucine*	508	Peptide	Dipeptide	62115	100009288	LC/MS Pos	2256	261.144	111320-19-5		15751004			0
alpha-hydroxycaproate	1558	Lipid	Fatty Acid, Monohydroxy	37073	100001723	LC/MS Neg	1920	131.071	6064-63-7	99824	90191		HMDB01624	0
alpha-hydroxyisocaproate	268	Amino Acid	Leucine, Isoleucine and Valine Metabolism	22132	100000706	LC/MS Neg	1840	131.071	10303-64-7	83697	75520	C03264	HMDB00746	0
alpha-hydroxyisovalerate	301	Amino Acid	Leucine, Isoleucine and Valine Metabolism	33937	100001300	LC/MS Neg	1126	117.056	600-37-3	99823	90190		HMDB00407	0
alpha-hydroxyisovaleroyl carnitine*	302	Amino Acid	Leucine, Isoleucine and Valine Metabolism	46263	100005836	LC/MS Pos	1863	262.165						0
alpha-ketoglutaramate*	43	Amino Acid	Glutamate Metabolism	62101	100002397	LC/MS Neg	711	144.03	18465-19-5					0
androstenediol (3beta,17beta) disulfate (1)	2759	Lipid	Androgenic Steroids	37202	100001992	LC/MS Neg	3740	224.062		87120982		C04295	HMDB03818	0
androstenediol (3beta,17beta) disulfate (2)	2760	Lipid	Androgenic Steroids	37203	100001994	LC/MS Neg	4065	224.062		87120982		C04295	HMDB03818	0
androstenediol (3beta,17beta) monosulfate (1)	2756	Lipid	Androgenic Steroids	37211	100002028	LC/MS Neg	4535	369.174	521-17-5	13847309			HMDB03818	0
androstenediol (3beta,17beta) monosulfate (2)	2757	Lipid	Androgenic Steroids	37210	100002029	LC/MS Neg	4500	369.174						22.2222
androsterone glucuronide	2740	Lipid	Androgenic Steroids	61846	100002761	LC/MS Neg	4953	465.249	1852-43-3	114833	102793	C11135	HMDB02829	33.3333
androsterone sulfate	2750	Lipid	Androgenic Steroids	31591	100001073	LC/MS Neg	5022	369.174	2479-86-9	159663	19988780		HMDB02759	0
anserine	80	Amino Acid	Histidine Metabolism	15747	100000044	LC/MS Neg	1124.8	239.115	10030-52-1	112072	100482	C01262	HMDB00194	0
arachidate (20:0)	1231	Lipid	Long Chain Fatty Acid	1118	893	LC/MS Neg	6240	311.296	506-30-9	10467	10035	C06425	HMDB02212	0
arachidonate (20:4n6)	1265	Lipid	Polyunsaturated Fatty Acid (n3 and n6)	1110	229	LC/MS Neg	5535	303.233	506-32-1	444899	392692	C00219	HMDB01043	0
argininate*	405	Amino Acid	Urea cycle; Arginine and Proline Metabolism	57461	100002769	LC/MS Pos	910	176.103	157-07-3	160437	140984		HMDB03148	0
arginine	371	Amino Acid	Urea cycle; Arginine and Proline Metabolism	1638	231	LC/MS Pos	700	175.119	1119-34-2	232	227	C00062	HMDB00517	0
argininosuccinate	372	Amino Acid	Urea cycle; Arginine and Proline Metabolism	15497	232	LC/MS Neg	638.1	289.115	156637-58-0	828	805	C03406	HMDB00052	5.55556
asparagine	38	Amino Acid	Alanine and Aspartate Metabolism	512	917	LC/MS Pos	679	133.061	70-47-3	6267	6031	C00152	HMDB00168	0
aspartate	34	Amino Acid	Alanine and Aspartate Metabolism	443	234	LC/MS Pos	668	134.045	56-84-8	5960	5745	C00049	HMDB00191	0
azelate (C9-DC)	1365	Lipid	Fatty Acid, Dicarboxylate	18362	2029	LC/MS Neg	1276	187.098	123-99-9	2266	2179	C08261	HMDB00784	0
benzoate	3762	Xenobiotics	Benzoate Metabolism	15778	100000008	LC/MS Neg	1750	121.029	65-85-0	243	238	C00180	HMDB01870	0
benzoylcarnitine*	4916	Xenobiotics	Chemical	43265	100004555	LC/MS Pos	2629.9	266.139	105450-08-6		28689447			0
beta-citrylglutamate (formerly X-12748)	53	Amino Acid	Glutamate Metabolism	54923	100003271	LC/MS Neg	530	320.062	73590-26-8	72715786	19992713	C20775		0
beta-hydroxyisovalerate	280	Amino Acid	Leucine, Isoleucine and Valine Metabolism	12129	1442	LC/MS Neg	1027	117.056	625-08-1	69362	62571		HMDB00754	0
beta-hydroxyisovaleroylcarnitine	281	Amino Acid	Leucine, Isoleucine and Valine Metabolism	35433	100001594	LC/MS Pos	1701	262.165	99159-87-2		21403176			0
betaine	6	Amino Acid	Glycine, Serine and Threonine Metabolism	3141	799	LC/MS Pos	734	118.086	107-43-7	247	24219951173	C00719	HMDB00043	0
biliverdin	3709	Cofactors and Vitamins	Hemoglobin and Porphyrin Metabolism	2137	250	LC/MS Neg	4695.6	581.241	55482-27-4;55482-27-4	5353439	10628548	C00500	HMDB01008	0
bradykinin	864	Peptide	Polypeptide	22154	100000967	LC/MS Pos	2996.8	530.788	58-82-2	439201	388341	C00306	HMDB04246	88.8889
bradykinin, des-arg(9)	866	Peptide	Polypeptide	34420	100001292	LC/MS Pos	3444.1	452.737	15958-92-6	105044	94778	C00306	HMDB04246	50
butyrylcarnitine (C4)	1441	Lipid	Fatty Acid Metabolism (also BCAA Metabolism)	32412	100001054	LC/MS Pos	1977	232.154	25576-40-3	439829	184820	C02862	HMDB02013	0
butyrylglycine	1442	Lipid	Fatty Acid Metabolism (also BCAA Metabolism)	31850	100001151	LC/MS Neg	1470	144.067	20208-73-5	88412	79766		HMDB00808	0
C-glycosyltryptophan	217	Amino Acid	Tryptophan Metabolism	48782	100006379	LC/MS Pos	1907	367.15	180509-18-6	10981970	9157171			0
caffeine	3838	Xenobiotics	Xanthine Metabolism	569	849	LC/MS Pos	2819	195.088	58-08-2	2519	2424	C07481	HMDB01847	0
caprate (10:0)	1200	Lipid	Medium Chain Fatty Acid	1642	888	LC/MS Neg	5090.7	171.139	334-48-5	2969	2863	C01571	HMDB00511	0
caproate (6:0)	1196	Lipid	Medium Chain Fatty Acid	32489	926	LC/MS Neg	2713.7	115.076	142-62-1	8892	8552	C01585	HMDB00535	0
caprylate (8:0)	1198	Lipid	Medium Chain Fatty Acid	32492	932	LC/MS Neg	4362	143.108	124-07-2	379	370	C06423	HMDB00482	0
carboxyibuprofen	4430	Xenobiotics	Drug - Analgesics, Anesthetics	43333	100004171	LC/MS Pos	4477	254.139	15935-54-3	10444113	8619532		HMDB60564	72.2222
carnitine	1536	Lipid	Carnitine Metabolism	15500	100000007	LC/MS Pos	688.9	162.112	461-05-2	10917	10455	C00318	HMDB00062	0
carnosine	77	Amino Acid	Histidine Metabolism	1768	249	LC/MS Neg	804	225.099	305-84-0	439224	388363	C00386	HMDB00033	0
catechol sulfate	3780	Xenobiotics	Benzoate Metabolism	35320	100001605	LC/MS Neg	1906	188.986	4918-96-1	3083879	2341024		HMDB59724	0
chenodeoxycholate	2815	Lipid	Primary Bile Acid Metabolism	1563	1123	LC/MS Neg	5264	391.285	474-24-9;474-25-9	10133		C02528	HMDB00518	0
cholate	2812	Lipid	Primary Bile Acid Metabolism	22842	136	LC/MS Neg	5165	407.28	81-25-4	221493		C00695	HMDB00619	0
choline	1776	Lipid	Phospholipid Metabolism	15506	1256	LC/MS Pos	675	104.107	67-48-1	305	149278	C00114	HMDB00097	0
choline phosphate	1777	Lipid	Phospholipid Metabolism	34396	267	LC/MS Pos	692.5	184.073	72556-74-2	1014	119298	C00588	HMDB01565	0
cis-4-decenoate (10:1n6)*	1201	Lipid	Medium Chain Fatty Acid	62873	100002796	LC/MS Neg	4890	169.123	505-90-8	5312351	4471776			0
cis-4-decenoylcarnitine (C10:1)	1488	Lipid	Fatty Acid Metabolism(Acyl Carnitine)	38178	100002259	LC/MS Pos	4468	314.233	98930-66-6		28639171			0
citrulline	380	Amino Acid	Urea cycle; Arginine and Proline Metabolism	2132	391	LC/MS Pos	730.3	176.103	372-75-8	9750	810	C00327	HMDB00904	0
CoA-glutathione*	461	Amino Acid	Glutathione Metabolism	62804	269	LC/MS Neg	1326	535.084	6477-52-7	11953788	10128089	C00920		0
coenzyme A	3647	Cofactors and Vitamins	Pantothenate and CoA Metabolism	46322	270	LC/MS Neg	1448	382.55	85-61-0;18439-24-2	317	311	C00010	HMDB01423	0
cortisol	2720	Lipid	Corticosteroids	1712	356	LC/MS Pos	4561.9	363.217	50-23-7	5754		C00735	HMDB00063	5.55556
cotinine	3856	Xenobiotics	Tobacco Metabolite	553	848	LC/MS Pos	1525.2	177.102	486-56-6	854019	746405		HMDB01046	77.7778
creatine	411	Amino Acid	Creatine Metabolism	27718	1221	LC/MS Pos	771	132.077	57-00-1	586	566	C00300	HMDB00064	0
creatine phosphate	413	Amino Acid	Creatine Metabolism	33951	100000112	LC/MS Neg	603	210.029	922-32-7	587	567	C02305	HMDB01511	11.1111
creatinine	412	Amino Acid	Creatine Metabolism	513	275	LC/MS Pos	730.8	114.066	60-27-5	588	568	C00791	HMDB00562	0
cyclo(gly-pro)	569	Peptide	Dipeptide	37077	100001946	LC/MS Pos	1767.3	155.082	3705-27-9	126154	112149			0
cyclo(phe-pro)	587	Peptide	Dipeptide	44875	100001927	LC/MS Pos	3644	245.128	3705-26-8	9837725;443440	3916578013445	C11847		0
cyclo(phe-pro) (L,D)*	588	Peptide	Dipeptide	43787	100004636	LC/MS Pos	3550	245.128		6992198	5360344			38.8889
cysteine-glutathione disulfide	445	Amino Acid	Glutathione Metabolism	35159	100001437	LC/MS Pos	824	214.051	13081-14-6	4247235	3455404		HMDB00656	0
cytidine	3568	Nucleotide	Pyrimidine Metabolism, Cytidine containing	514	827	LC/MS Pos	1075.9	244.093	65-46-3	6175	5940	C00475	HMDB00089	0
cytidine 5'-diphosphocholine	1778	Lipid	Phospholipid Metabolism	34418	1220	LC/MS Pos	776.6	489.115	33818-15-4	13804	21531769	C00307	HMDB01413	11.1111
cytidine 5'-monophosphate (5'-CMP)	3564	Nucleotide	Pyrimidine Metabolism, Cytidine containing	2372	282	LC/MS Pos	890	324.059	63-37-6	6131	5414497	C00055	HMDB00095	0
cytidine 5'-monophospho-N-acetylneuraminic acid	1112	Carbohydrate	Nucleotide Sugar	36831	1223	LC/MS Neg	650	613.14	3063-71-6	448209		C00128	HMDB01176	0
decanoylcarnitine (C10)	1485	Lipid	Fatty Acid Metabolism(Acyl Carnitine)	33941	100001251	LC/MS Pos	4700	316.248	1492-27-9	10245190	8420677		HMDB00651	0
dehydroascorbate	3654	Cofactors and Vitamins	Ascorbate and Aldarate Metabolism	34302	301	LC/MS Neg	739.6	173.009	490-83-5	835	812	C05422	HMDB01264	0
dehydroisoandrosterone sulfate (DHEA-S)	2738	Lipid	Androgenic Steroids	32425	100000792	LC/MS Neg	4745	367.158	651-48-9	12594	12074	C04555	HMDB01032	0
deoxycarnitine	1535	Lipid	Carnitine Metabolism	36747	100001662	LC/MS Pos	742.4	146.118	6249-56-5	134	705	C01181	HMDB01161	0
deoxycholate	2832	Lipid	Secondary Bile Acid Metabolism	1114	302	LC/MS Neg	5294	391.285	83-44-3	222528	389318	C04483	HMDB00626	0
dihomo-linoleate (20:2n6)	1269	Lipid	Polyunsaturated Fatty Acid (n3 and n6)	17805	1231	LC/MS Neg	5730	307.264	2091-39-6	6439848	4944228	C16525	HMDB05060	0
dihomo-linolenate (20:3n3 or n6)	1264	Lipid	Polyunsaturated Fatty Acid (n3 and n6)	35718	100001739	LC/MS Neg	5596	305.249	17046-59-2	5280581	4471954	C03242	HMDB02925	0
dihydroxyacetone phosphate (DHAP)	967	Carbohydrate	Glycolysis, Gluconeogenesis, and Pyruvate Metabolism	15522	309	LC/MS Neg	603	168.991	102783-56-2	668	3833110	C00111	HMDB01473	0
dimethylarginine (SDMA + ADMA)	386	Amino Acid	Urea cycle; Arginine and Proline Metabolism	36808	100001810	LC/MS Pos	810	203.15	102783-24-4	123831	110375	C03626	HMDB01539	0
docosadienoate (22:2n6)	1268	Lipid	Polyunsaturated Fatty Acid (n3 and n6)	32415	100001182	LC/MS Neg	6034	335.296	7370-49-2	5282807	4445934	C16533	HMDB61714	0
docosahexaenoate (DHA; 22:6n3)	1255	Lipid	Polyunsaturated Fatty Acid (n3 and n6)	44675	100000665	LC/MS Neg	5525	327.233	6217-54-5	445580	393183	C06429	HMDB02183	0
docosapentaenoate (n3 DPA; 22:5n3)	1254	Lipid	Polyunsaturated Fatty Acid (n3 and n6)	32504	100001181	LC/MS Neg	5571	329.249	2234-74-4	6441454		C16513	HMDB06528	0
docosapentaenoate (n6 DPA; 22:5n6)	1267	Lipid	Polyunsaturated Fatty Acid (n3 and n6)	37478	100001580	LC/MS Neg	5624.5	329.249	25182-74-5	6441454	4945614	C16513	HMDB01976	0
docosatrienoate (22:3n3)	1256	Lipid	Polyunsaturated Fatty Acid (n3 and n6)	32417	100001195	LC/MS Neg	5823	333.28	59708-86-0	5312556	4471981	C16534	HMDB02823	27.7778
docosatrienoate (22:3n6)*	1272	Lipid	Polyunsaturated Fatty Acid (n3 and n6)	57467	100015762	LC/MS Neg	5850	333.28						55.5556
dodecadienoate (12:2)*	1369	Lipid	Fatty Acid, Dicarboxylate	62276	100020478	LC/MS Neg	5146	195.139						0
dodecenedioate (C12:1-DC)*	1374	Lipid	Fatty Acid, Dicarboxylate	61864	100019972	LC/MS Neg	2700	227.129						0
dopamine 3-O-sulfate	188	Amino Acid	Tyrosine Metabolism	48407	100006361	LC/MS Neg	1556.2	232.028		122136	108936	C13690	HMDB06275	0
eicosapentaenoate (EPA; 20:5n3)	1253	Lipid	Polyunsaturated Fatty Acid (n3 and n6)	18467	2050	LC/MS Neg	5450	301.217	10-2005-9;10417-94-4	446284	393682	C06428	HMDB01999	0
eicosenoate (20:1)	1234	Lipid	Long Chain Fatty Acid	33587	100001335	LC/MS Neg	5950	309.28		5282768	4445895	C16526	HMDB02231	0
epiandrosterone sulfate	2742	Lipid	Androgenic Steroids	33973	100001287	LC/MS Neg	4855	369.174	22229-22-7	9929317	21403101			0
epsilon-caprolactam	4376	Xenobiotics	Bacterial/Fungal	52985	100008938	LC/MS Pos	2606	114.091	105-60-2			C06593		0
ergothioneine	4069	Xenobiotics	Food Component/Plant	37459	100002154	LC/MS Neg	821	228.081	58511-63-0	3032311	2297320	C05570	HMDB03045	5.55556
erucamide	1409	Lipid	Fatty Acid, Amide	35177	100001444	LC/MS Pos	6335	338.342	112-84-5	5365371	4517399			0
erucate (22:1n9)	1239	Lipid	Long Chain Fatty Acid	1552	1087	LC/MS Neg	6355.6	337.311	112-86-7	5281116	7924	C08316	HMDB02068	0
Fibrinopeptide A (5-16)*	903	Peptide	Fibrinogen Cleavage Peptide	62148	100020274	LC/MS Pos	3265	603.793						0
Fibrinopeptide A*	898	Peptide	Fibrinogen Cleavage Peptide	33084	100001322	LC/MS Pos	3312.4	768.85	25422-31-5	16133137	14654187			5.55556
Fibrinopeptide A, des-ala(1)*	906	Peptide	Fibrinogen Cleavage Peptide	31548	100001323	LC/MS Pos	3397.9	733.331			21403111			0
Fibrinopeptide A, phosphono-ser(3)*	907	Peptide	Fibrinogen Cleavage Peptide	57712	100001324	LC/MS Neg	2016	806.818	886023-52-5		21403112			0
Fibrinopeptide B	917	Peptide	Fibrinogen Cleavage Peptide	61837	100015991	LC/MS Neg	2909	774.822	36204-23-6					88.8889
Fibrinopeptide B (1-11)**	919	Peptide	Fibrinogen Cleavage Peptide	62815	100020912	LC/MS Pos	4062	619.752						0
Fibrinopeptide B (1-12)**	920	Peptide	Fibrinogen Cleavage Peptide	62814	100020910	LC/MS Neg	2366	661.253						5.55556
Fibrinopeptide B (1-13)**	921	Peptide	Fibrinogen Cleavage Peptide	62813	100020908	LC/MS Neg	2482	696.772						0
Fibrinopeptide B (1-9)**	918	Peptide	Fibrinogen Cleavage Peptide	62816	100020913	LC/MS Pos	2260	472.683						0
flavin adenine dinucleotide (FAD)	3640	Cofactors and Vitamins	Riboflavin Metabolism	2134	327	LC/MS Neg	2425	784.15	146-14-5;84366-81-4	643975	559059	C00016	HMDB01248	0
flavin mononucleotide (FMN)	3641	Cofactors and Vitamins	Riboflavin Metabolism	15797	100000251	LC/MS Neg	2390	455.097	130-40-5	710	690	C00061	HMDB01520	0
fructose 1,6-bisphosphate	964	Carbohydrate	Glycolysis, Gluconeogenesis, and Pyruvate Metabolism	15926	1253	LC/MS Neg	553.1	338.989	38099-82-0;103213-44-1	172313	9902130	C05378	HMDB01058	0
gabapentin	4666	Xenobiotics	Drug - Neurological	38686	100002806	LC/MS Pos	2515	172.133	60142-96-3	3446	3328	D00332	HMDB05015	77.7778
gamma-glutamylalanine	465	Peptide	Gamma-glutamyl Amino Acid	37063	100001843	LC/MS Pos	1116	219.098	5875-41-2	440103	389104		HMDB29142	0
gamma-glutamylglutamate	467	Peptide	Gamma-glutamyl Amino Acid	36738	331	LC/MS Pos	1045	277.103	1116-22-9	92865	83831	C05282	HMDB11737	0
gamma-glutamylglutamine	468	Peptide	Gamma-glutamyl Amino Acid	2730	1140	LC/MS Pos	817.9	276.119	10148-81-9	150914	133013	C05283	HMDB11738	0
gamma-glutamylisoleucine*	471	Peptide	Gamma-glutamyl Amino Acid	34457	100001485	LC/MS Neg	1600	259.13		14253342	21403145		HMDB11170	0
gamma-glutamylleucine	472	Peptide	Gamma-glutamyl Amino Acid	18369	1268	LC/MS Neg	1685	259.13	2566-39-4	151023	133115		HMDB11171	0
gamma-glutamylphenylalanine	476	Peptide	Gamma-glutamyl Amino Acid	33422	100000491	LC/MS Pos	2865	295.129	7432-24-8	111299	99868		HMDB00594	0
gamma-glutamyltyrosine	479	Peptide	Gamma-glutamyl Amino Acid	2734	1102	LC/MS Pos	2080.4	311.124	7432-23-7	94340	85142		HMDB11741	0
gamma-glutamylvaline	480	Peptide	Gamma-glutamyl Amino Acid	43829	100001126	LC/MS Pos	2045	247.129	2746-34-1	7015683			HMDB11172	27.7778
glucuronide of piperine metabolite C17H21NO3 (4)*	4161	Xenobiotics	Food Component/Plant	62291	100020492	LC/MS Neg	3992	462.177						11.1111
glutamate	41	Amino Acid	Glutamate Metabolism	57	561	LC/MS Pos	710	148.06	56-86-0	611	591	C00025	HMDB00148	0
glutamate, gamma-methyl ester	50	Amino Acid	Glutamate Metabolism	33487	100001103	LC/MS Pos	1068.8	162.076	1499-55-4;1499-55-4	68662	66546		HMDB61715	27.7778
glutamine	42	Amino Acid	Glutamate Metabolism	53	563	LC/MS Pos	680	147.076	56-85-9	5961	5746	C00064	HMDB00641	0
glutaminylleucine	608	Peptide	Dipeptide	42994	100003160	LC/MS Pos	2195	260.16						0
glutarylcarnitine (C5-DC)	109	Amino Acid	Lysine Metabolism	44664	100001593	LC/MS Pos	1583.3	276.144	102636-82-8	71464488	21403175		HMDB13130	0
glutathione, oxidized (GSSG)	443	Amino Acid	Glutathione Metabolism	38783	448	LC/MS Pos	1512	307.083	103239-24-3	65359	58835	C00127	HMDB03337	0
glutathione, reduced (GSH)	442	Amino Acid	Glutathione Metabolism	2127	496	LC/MS Pos	1270	308.091	70-18-8	124886	111188	C00051	HMDB00125	0
glycerate	978	Carbohydrate	Glycolysis, Gluconeogenesis, and Pyruvate Metabolism	1572	1052	LC/MS Neg	650	105.019	600-19-1	752	732	C00258	HMDB00139	0
glycerol	2342	Lipid	Glycerolipid Metabolism	15122	1254	LC/MS Neg	758	91.0401	56-81-5	753	733	C00116	HMDB00131	77.7778
glycerol 3-phosphate	2343	Lipid	Glycerolipid Metabolism	43847	100000258	LC/MS Neg	613.2	171.006	29849-82-9	754	734	C00093	HMDB00126	0
glycerophosphoethanolamine	1784	Lipid	Phospholipid Metabolism	37455	100001620	LC/MS Pos	705	216.063	33049-08-0	123874	110410	C01233	HMDB00114	0
glycerophosphoinositol*	1786	Lipid	Phospholipid Metabolism	52307	100001621	LC/MS Neg	630	333.059	16824-65-0	167572				5.55556
glycerophosphorylcholine (GPC)	1780	Lipid	Phospholipid Metabolism	15990	100000269	LC/MS Pos	709.9	258.11	28319-77-9	71920	571409	C00670	HMDB00086	0
glycochenodeoxycholate	2816	Lipid	Primary Bile Acid Metabolism	32346	1628	LC/MS Neg	5236.1	448.307	16564-43-5	12544		C05466	HMDB00637	0
glycochenodeoxycholate 3-sulfate	2829	Lipid	Primary Bile Acid Metabolism	52974	100006641	LC/MS Neg	4820	263.628						33.3333
glycocholate	2813	Lipid	Primary Bile Acid Metabolism	18476	342	LC/MS Neg	5163	464.302	475-31-0;863-57-0	10140	9734	C01921	HMDB00138	0
glycocholenate sulfate*	2868	Lipid	Secondary Bile Acid Metabolism	32599	100001989	LC/MS Neg	4750	254.623						0
glycodeoxycholate	2834	Lipid	Secondary Bile Acid Metabolism	18477	100000436	LC/MS Neg	5281	448.307	360-65-6	3035026		C05464	HMDB00631	0
glycodeoxycholate 3-sulfate	2873	Lipid	Secondary Bile Acid Metabolism	52975	100006642	LC/MS Neg	4875	263.628						22.2222
glycolithocholate sulfate*	2842	Lipid	Secondary Bile Acid Metabolism	32620	100001657	LC/MS Neg	5011	255.631	15324-64-8	72222	65188	C11301	HMDB02639	0
glycylisoleucine	630	Peptide	Dipeptide	36659	100001790	LC/MS Pos	2080	189.123	19461-38-2	88079	19972556		HMDB28844	0
glycylleucine	631	Peptide	Dipeptide	34398	100001258	LC/MS Pos	2190.9	189.123	869-19-2	92843	83812	C02155	HMDB00759	0
glycylvaline	641	Peptide	Dipeptide	18357	100000487	LC/MS Pos	1561.6	175.108	1963-21-9	97417	2006926		HMDB28854	0
guaiacol sulfate	3783	Xenobiotics	Benzoate Metabolism	46111	100004208	LC/MS Neg	2344	203.002		22473	21078		HMDB60013	0
guanine	3505	Nucleotide	Purine Metabolism, Guanine containing	32352	172	LC/MS Pos	1035	152.057	73-40-5	764	744	C00242	HMDB00132	0
guanosine	3504	Nucleotide	Purine Metabolism, Guanine containing	1573	1099	LC/MS Neg	1662	282.084	118-00-3	6802	6544	C00387	HMDB00133	0
guanosine 2'-monophosphate (2'-GMP)*	3522	Nucleotide	Purine Metabolism, Guanine containing	52442	100002733	LC/MS Neg	1150	362.051		444571	392466			83.3333
guanosine 3'-monophosphate (3'-GMP)	3500	Nucleotide	Purine Metabolism, Guanine containing	39786	100002704	LC/MS Pos	1550	364.065	117-68-0	3522	3402			61.1111
guanosine 5'- monophosphate (5'-GMP)	3499	Nucleotide	Purine Metabolism, Guanine containing	2849	347	LC/MS Pos	1300	364.065	1333479	6804	741	C00144	HMDB01397	0
guanosine 5'-triphosphate	3497	Nucleotide	Purine Metabolism, Guanine containing	2847	345	LC/MS Neg	592	521.983	373-49-9	6830	6569	C00044	HMDB01273	66.6667
heme	3705	Cofactors and Vitamins	Hemoglobin and Porphyrin Metabolism	41754	100001386	LC/MS Neg	5325	632.172	14875-96-8	26945		C00032	HMDB03178	0
hexadecadienoate (16:2n6)	1248	Lipid	Polyunsaturated Fatty Acid (n3 and n6)	57652	100009394	LC/MS Neg	5398	251.202	28290-73-5		13628094		HMDB00477	0
hexadecanedioate (C16-DC)	1373	Lipid	Fatty Acid, Dicarboxylate	35678	100001614	LC/MS Neg	4615	285.207	505-54-4	10459	10027	C19615	HMDB00672	0
hexadecatrienoate (16:3n3)	1249	Lipid	Polyunsaturated Fatty Acid (n3 and n6)	57651	100009393	LC/MS Neg	5330	249.186	7561-64-0	5312428	4471853			0
hexanoylcarnitine (C6)	1480	Lipid	Fatty Acid Metabolism(Acyl Carnitine)	32328	100000781	LC/MS Pos	3194	260.186	6920-35-0	6426853	4932273		HMDB00705	0
hippurate	3748	Xenobiotics	Benzoate Metabolism	15753	100000014	LC/MS Neg	2106.9	178.051	495-69-2	464	451	C01586	HMDB00714	0
histamine	81	Amino Acid	Histidine Metabolism	1574	354	LC/MS Pos	579	112.087	51-45-6	774	753	C00388	HMDB00870	0
histidine	65	Amino Acid	Histidine Metabolism	59	355	LC/MS Neg	755.9	154.062	5934-29-2	6274	752	C00135	HMDB00177	0
homoarginine	381	Amino Acid	Urea cycle; Arginine and Proline Metabolism	22137	100000961	LC/MS Pos	700	189.135	156-86-5	9085	8732	C01924	HMDB00670	5.55556
homocitrulline	382	Amino Acid	Urea cycle; Arginine and Proline Metabolism	22138	100000963	LC/MS Pos	821.7	190.119	1190-49-4	65072	58582	C02427	HMDB00679	0
HWESASXX*	870	Peptide	Polypeptide	32836	100001327	LC/MS Pos	3572.3	471.738			21403115			5.55556
HXGXA*	869	Peptide	Polypeptide	62508	100001330	LC/MS Neg	3600	508.289			21403116			94.4444
hydroxy-CMPF*	1382	Lipid	Fatty Acid, Dicarboxylate	62277	100019794	LC/MS Neg	1516	255.087						0
hypotaurine	363	Amino Acid	Methionine, Cysteine, SAM and Taurine Metabolism	590	358	LC/MS Pos	690	110.027	300-84-5	107812	96959	C00519	HMDB00965	11.1111
hypoxanthine	3446	Nucleotide	Purine Metabolism, (Hypo)Xanthine/Inosine containing	3127	171	LC/MS Neg	1291.2	135.031	68-94-0	790	768	C00262	HMDB00157	0
imidazole lactate	76	Amino Acid	Histidine Metabolism	15716	100000263	LC/MS Neg	739.4	155.046	14403-45-3	440129	389128	C05568	HMDB02320	0
imidazole propionate	74	Amino Acid	Histidine Metabolism	40730	100003434	LC/MS Pos	1020	141.066	1074-59-5	70630	63798		HMDB02271	11.1111
indoleacetate	242	Amino Acid	Tryptophan Metabolism	27513	100001034	LC/MS Neg	2200	174.056	6505-45-9	802	780	C00954	HMDB00197	0
indolelactate	241	Amino Acid	Tryptophan Metabolism	18349	100000463	LC/MS Pos	3514	206.081	832-97-3	92904	83867	C02043	HMDB00671	0
indolepropionate	244	Amino Acid	Tryptophan Metabolism	32405	100001083	LC/MS Pos	4147.9	190.086	830-96-6	3744	3613		HMDB02302	0
inosine	3445	Nucleotide	Purine Metabolism, (Hypo)Xanthine/Inosine containing	1123	361	LC/MS Neg	1602.1	267.073	58-63-9	6021	21241953	C00294	HMDB00195	0
inosine 5'-monophosphate (IMP)	3444	Nucleotide	Purine Metabolism, (Hypo)Xanthine/Inosine containing	2133	362	LC/MS Neg	650	347.04	4691-65-0	8582	5482599	C00130	HMDB00175	0
Isobar: glucose, fructose, mannose, galactose, etc.	1093	Carbohydrate	Fructose, Mannose and Galactose Metabolism	47970	100020964	LC/MS Neg	708	179.056						16.6667
isobutyrylcarnitine (C4)	326	Amino Acid	Leucine, Isoleucine and Valine Metabolism	33441	100001055	LC/MS Pos	1955.1	232.154	25518-49-4	168379			HMDB00736	0
isobutyrylglycine	327	Amino Acid	Leucine, Isoleucine and Valine Metabolism	35437	100001590	LC/MS Neg	1420	144.067	15926-18-8	10855600	9030891		HMDB00730	0
isoleucine	296	Amino Acid	Leucine, Isoleucine and Valine Metabolism	1125	376	LC/MS Pos	1599	132.102	73-32-5	6306	769	C00407	HMDB00172	0
isoleucylglycine	665	Peptide	Dipeptide	40008	100003169	LC/MS Pos	1740	189.123	868-28-0	342532	303621		HMDB28907	0
isovalerate (i5:0)	271	Amino Acid	Leucine, Isoleucine and Valine Metabolism	44656	100000708	LC/MS Neg	1564	101.061	503-74-2	10430	10001	C08262	HMDB00718	5.55556
isovalerylcarnitine (C5)	273	Amino Acid	Leucine, Isoleucine and Valine Metabolism	34407	100001393	LC/MS Pos	2504.9	246.17	31023-24-2	6426851	4932271		HMDB00688	0
isovalerylglycine	272	Amino Acid	Leucine, Isoleucine and Valine Metabolism	35107	100001452	LC/MS Neg	1950	158.082	16284-60-9	546304	475516		HMDB00678	0
kynurenate	225	Amino Acid	Tryptophan Metabolism	1417	98	LC/MS Neg	2224	188.035	492-27-3	3845	3712	C01717	HMDB00715	16.6667
kynurenine	221	Amino Acid	Tryptophan Metabolism	15140	100000265	LC/MS Pos	1902.1	209.092	2922-83-0	161166	141580	C00328	HMDB00684	0
lactate	975	Carbohydrate	Glycolysis, Gluconeogenesis, and Pyruvate Metabolism	527	482	LC/MS Neg	681.6	89.0244	79-33-4	612	592	C00186	HMDB00190	0
laurylcarnitine (C12)	1489	Lipid	Fatty Acid Metabolism(Acyl Carnitine)	34534	100001392	LC/MS Pos	5070	344.28	25518-54-1	10427569	8602997		HMDB02250	0
leucine	261	Amino Acid	Leucine, Isoleucine and Valine Metabolism	60	397	LC/MS Pos	1680.2	132.102	61-90-5	6106	5880	C00123	HMDB00687	0
leucylalanine	679	Peptide	Dipeptide	40010	100003179	LC/MS Pos	1770	203.139	7298-84-2	259321	227625		HMDB28922	0
leucylglycine	684	Peptide	Dipeptide	40045	100003185	LC/MS Pos	1805	189.123	686-50-0	79070	71402		HMDB28929	0
lidocaine	4450	Xenobiotics	Drug - Analgesics, Anesthetics	35661	100001538	LC/MS Neg	5283	233.166	137-58-6	3676	3548	D00358	HMDB14426	0
linoleamide (18:2n6)	1413	Lipid	Fatty Acid, Amide	32455	1492	LC/MS Pos	5652	280.263	766652	6435901	4940587			0
linoleate (18:2n6)	1260	Lipid	Polyunsaturated Fatty Acid (n3 and n6)	1105	180	LC/MS Neg	5535	279.233	60-33-3	5280450	4444105	C01595	HMDB00673	0
linolenate [alpha or gamma; (18:3n3 or 6)]	1262	Lipid	Polyunsaturated Fatty Acid (n3 and n6)	34035	100001337	LC/MS Neg	5450	277.217		5280934	4444437	C06426	HMDB03073	0
linoleoyl ethanolamide	1730	Lipid	Endocannabinoid	52608	100006726	LC/MS Neg	6150	322.275	68171-52-8	5283446	4446566		HMDB12252	0
linoleoylcarnitine (C18:2)*	1495	Lipid	Fatty Acid Metabolism(Acyl Carnitine)	46223	100003151	LC/MS Pos	5190	424.342	36816-10-1	6450015	4952667		HMDB06469	0
lysine	92	Amino Acid	Lysine Metabolism	1301	407	LC/MS Pos	613.8	147.113	56-87-1	5962	5747	C00047	HMDB00182	0
malate	1164	Energy	TCA Cycle	1303	409	LC/MS Neg	615.6	133.014	6915-15-7	525	510	C00149	HMDB00156	0
malonylcarnitine	1180	Lipid	Fatty Acid Synthesis	37059	100001526	LC/MS Pos	965	248.113	853728-01-5	22833583	21403153		HMDB02095	0
maltitol/lactitol/cellobiotol/palatinol	1066	Carbohydrate	Disaccharides and Oligosaccharides	57379	100015645	LC/MS Neg	750	343.125						0
maltopentaose	1023	Carbohydrate	Glycogen Metabolism	35163	100001447	LC/MS Pos	1110	829.282	34620-76-3	13489094	2941513	C06218	HMDB12254	27.7778
maltotetraose	1024	Carbohydrate	Glycogen Metabolism	15910	100000275	LC/MS Neg	910	665.215	34612-38-9	446495	393830	C02052	HMDB01296	0
maltotriose	1026	Carbohydrate	Glycogen Metabolism	44688	100000276	LC/MS Neg	812	503.162	1109-28-0	439586	388669	C01835	HMDB01262	0
margarate (17:0)	1215	Lipid	Long Chain Fatty Acid	1121	891	LC/MS Neg	5731	269.249	506-12-7	10465	10033		HMDB02259	0
mead acid (20:3n9)	1271	Lipid	Polyunsaturated Fatty Acid (n3 and n6)	35174	100001472	LC/MS Neg	5650	305.249	20590-32-3	5312531	4471956		HMDB10378	0
methionine	332	Amino Acid	Methionine, Cysteine, SAM and Taurine Metabolism	1302	415	LC/MS Pos	1250	150.058	63-68-3	6137	5907	C00073	HMDB00696	0
methionine sulfone	336	Amino Acid	Methionine, Cysteine, SAM and Taurine Metabolism	44878	100004635	LC/MS Neg	740.8	180.034	820-10-0	69961	63154			0
methyl-4-hydroxybenzoate	3791	Xenobiotics	Benzoate Metabolism	34386	100001252	LC/MS Neg	3671	151.04	99-76-3	7456	7176	D01400	HMDB32572	5.55556
methyl-4-hydroxybenzoate sulfate	3813	Xenobiotics	Benzoate Metabolism	48429	100006116	LC/MS Neg	2873	230.997						5.55556
metoprolol	4574	Xenobiotics	Drug - Cardiovascular	18037	2028	LC/MS Pos	3186.6	268.191	56392-17-7	4171	4027	D02358	HMDB01932	83.3333
metoprolol acid metabolite*	4575	Xenobiotics	Drug - Cardiovascular	34109	100001385	LC/MS Pos	2558	268.154	56392-14-4	62936	56653			72.2222
mycophenolic acid	4539	Xenobiotics	Drug - Antiinflammatory, Immunosuppressant	54800	100009253	LC/MS Neg	4185	319.119	24280-93-1	446541	393865	C20380,D05096	HMDB15159	94.4444
mycophenolic acid glucuronide	4540	Xenobiotics	Drug - Antiinflammatory, Immunosuppressant	54792	100009254	LC/MS Neg	2627	495.151		6442661	4946725			94.4444
myo-inositol	1747	Lipid	Inositol Metabolism	1124	363	LC/MS Neg	673	179.056	87-89-8	892	10239179	C00137	HMDB00211	0
myristate (14:0)	1207	Lipid	Long Chain Fatty Acid	1365	519	LC/MS Neg	5440	227.202	544-63-8	11005	10539	C06424	HMDB00806	0
myristoleate (14:1n5)	1208	Lipid	Long Chain Fatty Acid	32418	100001198	LC/MS Neg	5346.9	225.186	544-64-9	5281119	4444564	C08322	HMDB02000	0
myristoleoylcarnitine (C14:1)*	1500	Lipid	Fatty Acid Metabolism(Acyl Carnitine)	48182	100006051	LC/MS Pos	5120	370.295	889848-55-9	90659872	34999520			0
myristoylcarnitine (C14)	1490	Lipid	Fatty Acid Metabolism(Acyl Carnitine)	33952	100001270	LC/MS Pos	5142.1	372.311	18822-89-4	6426854	4932274		HMDB05066	0
N,N,N-trimethyl-5-aminovalerate	119	Amino Acid	Lysine Metabolism	57687	100015962	LC/MS Pos	1028	160.133			34236878			0
N-(2-furoyl)glycine	4128	Xenobiotics	Food Component/Plant	31536	100001086	LC/MS Neg	1525	168.03	5657-19-2;5657-19-2	21863	20549		HMDB00439	0
N-acetyl-aspartyl-glutamate (NAAG)	52	Amino Acid	Glutamate Metabolism	35665	100001612	LC/MS Pos	1575.4	305.098	3106-85-2	5255	5065	C12270	HMDB01067	0
N-acetyl-isoputreanine*	420	Amino Acid	Polyamine Metabolism	62309	100020487	LC/MS Pos	1170	203.139						0
N-acetylalanine	30	Amino Acid	Alanine and Aspartate Metabolism	1585	1110	LC/MS Pos	1595.7	132.066	97-69-8	88064	79449	C02847	HMDB00766	0
N-acetylarginine	387	Amino Acid	Urea cycle; Arginine and Proline Metabolism	33953	100001266	LC/MS Pos	1116	217.13	155-84-0	67427	60752	C02562	HMDB04620	0
N-acetylcarnosine	79	Amino Acid	Histidine Metabolism	43488	100004046	LC/MS Pos	1166	269.124	56353-15-2	9903482	8079136		HMDB12881	0
N-acetylglutamine	45	Amino Acid	Glutamate Metabolism	33943	100001253	LC/MS Pos	1193	189.087	2490-97-3	182230	158492	C02716	HMDB06029	0
N-acetylglycine	2	Amino Acid	Glycine, Serine and Threonine Metabolism	27710	100001006	LC/MS Neg	731	116.035	543-24-8	10972	10507		HMDB00532	0
N-acetylhistidine	68	Amino Acid	Histidine Metabolism	33946	100001293	LC/MS Pos	848	198.087	39145-52-3	75619	68142	C02997	HMDB32055	0
N-acetylisoleucine	298	Amino Acid	Leucine, Isoleucine and Valine Metabolism	33967	100001276	LC/MS Neg	2325	172.098	3077-46-1	2802421	2081100		HMDB61684	0
N-acetylleucine	262	Amino Acid	Leucine, Isoleucine and Valine Metabolism	1587	1082	LC/MS Neg	2400	172.098	1188-21-2	70912	64075	C02710	HMDB11756	0
N-acetylmethionine	333	Amino Acid	Methionine, Cysteine, SAM and Taurine Metabolism	1589	1083	LC/MS Neg	1787	190.054	65-82-7	448580	395338	C02712	HMDB11745	0
N-acetylmethionine sulfoxide	338	Amino Acid	Methionine, Cysteine, SAM and Taurine Metabolism	45428	100005463	LC/MS Pos	1400	208.064	108646-71-5	193368	167798			0
N-acetylphenylalanine	121	Amino Acid	Phenylalanine Metabolism	33950	100001256	LC/MS Neg	2597	206.082	2018-61-3	74839	67404	C03519	HMDB00512	0
N-acetylserine	10	Amino Acid	Glycine, Serine and Threonine Metabolism	37076	100001851	LC/MS Pos	1021	148.06	97-14-3	65249	58744		HMDB02931	0
N-acetyltaurine	365	Amino Acid	Methionine, Cysteine, SAM and Taurine Metabolism	48187	100005466	LC/MS Neg	800	166.018		159864	140553			0
N-acetylthreonine	17	Amino Acid	Glycine, Serine and Threonine Metabolism	33939	100001274	LC/MS Neg	821.6	160.062	17093-74-2	152204	3841173		HMDB62557	0
N-acetyltryptophan	211	Amino Acid	Tryptophan Metabolism	33959	100001254	LC/MS Neg	2630	245.093	1218-34-4	700653	610602	C03137	HMDB13713	5.55556
N-acetyltyrosine	138	Amino Acid	Tyrosine Metabolism	32390	100001104	LC/MS Neg	1680	222.077	537-55-3	68310	61606		HMDB00866	0
N-acetylvaline	319	Amino Acid	Leucine, Isoleucine and Valine Metabolism	1591	1084	LC/MS Neg	1704	158.082	96-81-1	66789	60154		HMDB11757	0
N-delta-acetylornithine	392	Amino Acid	Urea cycle; Arginine and Proline Metabolism	43249	100004523	LC/MS Pos	887	175.108		9920500	8096135			0
N-ethylglycinexylidide	4451	Xenobiotics	Drug - Analgesics, Anesthetics	33080	100001539	LC/MS Pos	2630	207.149	7728-40-7	24415	22824	C16561	HMDB60656	0
N-formylmethionine	334	Amino Acid	Methionine, Cysteine, SAM and Taurine Metabolism	2829	194	LC/MS Neg	1543.8	176.039	4289-98-9	439750	388809	C03145	HMDB01015	0
N-formylphenylalanine	191	Amino Acid	Tyrosine Metabolism	48433	100006056	LC/MS Neg	2360	192.067	13200-85-6	759256	663938			0
N-methylhydroxyproline**	396	Amino Acid	Urea cycle; Arginine and Proline Metabolism	62068	100020215	LC/MS Pos	1444	146.081						0
N-methylpipecolate	4386	Xenobiotics	Bacterial/Fungal	47101	100005383	LC/MS Pos	1129	144.102	41447-17-0	11286529	9461516			0
N-methylproline	402	Amino Acid	Urea cycle; Arginine and Proline Metabolism	37431	100001956	LC/MS Pos	831	130.086	475-11-6	557	541			0
N-oleoyltaurine	1724	Lipid	Endocannabinoid	39732	100003119	LC/MS Neg	5610	388.253	52514-04-2	6437033	4941625			22.2222
N-palmitoyltaurine	1726	Lipid	Endocannabinoid	39835	100003239	LC/MS Neg	5560	362.237	83982-06-3		14435932			0
N-stearoyltaurine	1725	Lipid	Endocannabinoid	39730	100003240	LC/MS Neg	5782	390.268	63155-80-6	168274	147194			0
N1-Methyl-2-pyridone-5-carboxamide	3634	Cofactors and Vitamins	Nicotinate and Nicotinamide Metabolism	40469	100001468	LC/MS Neg	1668	151.051	701-44-0	69698	62899	C05842	HMDB04193	0
N1-Methyl-4-pyridone-3-carboxamide	3635	Cofactors and Vitamins	Nicotinate and Nicotinamide Metabolism	62593	100001469	LC/MS Pos	1646	153.066	769-49-3	440810	389671	C05843	HMDB04194	0
N1-methyladenosine	3476	Nucleotide	Purine Metabolism, Adenine containing	15650	1242	LC/MS Pos	1399	282.12	15763-06-1	27476	4573813	C02494	HMDB03331	0
N1-methylguanosine	3511	Nucleotide	Purine Metabolism, Guanine containing	31609	100001122	LC/MS Pos	1869	298.115	2140-65-0	96373	86996		HMDB01563	0
N2,N2-dimethylguanosine	3513	Nucleotide	Purine Metabolism, Guanine containing	35137	100001412	LC/MS Pos	2168	312.13	2140-67-2	92919	83878		HMDB04824	0
N2-acetyllysine	93	Amino Acid	Lysine Metabolism	36751	100001721	LC/MS Pos	836	189.123	1946-82-3	92907	83869	C12989	HMDB00446	11.1111
N4-acetylcytidine	3572	Nucleotide	Pyrimidine Metabolism, Cytidine containing	35130	100001413	LC/MS Pos	2040	286.103	3768-18-1	107461	96702		HMDB05923	0
N6,N6,N6-trimethyllysine	101	Amino Acid	Lysine Metabolism	1498	189	LC/MS Pos	690	189.16	23284-33-5	440120	140379	C03793	HMDB01325	0
N6-acetyllysine	94	Amino Acid	Lysine Metabolism	36752	100001734	LC/MS Pos	1140	189.123	692-04-6	92832	83801	C02727	HMDB00206	0
N6-carbamoylthreonyladenosine	3486	Nucleotide	Purine Metabolism, Adenine containing	35157	100001415	LC/MS Pos	2673	413.142	24719-82-2	161466	141829		HMDB41623	0
N6-succinyladenosine	3496	Nucleotide	Purine Metabolism, Adenine containing	48130	100001664	LC/MS Pos	2222	384.115	4542-23-8	165243			HMDB00912	0
nicotinamide	3615	Cofactors and Vitamins	Nicotinate and Nicotinamide Metabolism	594	432	LC/MS Pos	1271.1	123.055	98-92-0	936	911	C00153	HMDB01406	0
nicotinamide adenine dinucleotide (NAD+)	3619	Cofactors and Vitamins	Nicotinate and Nicotinamide Metabolism	5278	1310	LC/MS Neg	1434	662.102	53-84-9	5893	5681	C00003	HMDB00902	5.55556
nicotinate	3612	Cofactors and Vitamins	Nicotinate and Nicotinamide Metabolism	1504	567	LC/MS Neg	1180	122.025	59-67-6	938	913	C00253	HMDB01488	0
nonadecanoate (19:0)	1227	Lipid	Long Chain Fatty Acid	1356	892	LC/MS Neg	6068	297.28	646-30-0	12591	12071	C16535	HMDB00772	0
o-cresol sulfate	3827	Xenobiotics	Benzoate Metabolism	36845	100001806	LC/MS Neg	2796	187.007		11615528	9790277			55.5556
O-sulfo-L-tyrosine	4823	Xenobiotics	Chemical	45413	100005384	LC/MS Pos	1574	262.038		514186	448617			0
octanoylcarnitine (C8)	1483	Lipid	Fatty Acid Metabolism(Acyl Carnitine)	33936	100001247	LC/MS Pos	4090	288.217	3671-77-0	123701	110274	C02838	HMDB00791	0
oleamide	1419	Lipid	Fatty Acid, Amide	32458	1504	LC/MS Pos	5780	282.279	301-02-0	5283387	4446508	C19670	HMDB02117	0
oleate/vaccenate (18:1)	1220	Lipid	Long Chain Fatty Acid	52285	100008930	LC/MS Neg	5655	281.249						0
oleoyl CoA	1193	Lipid	Fatty Acid Metabolism	57751	443	LC/MS Neg	5440	514.673	1716-06-9		21403005	C00510	HMDB01322	5.55556
oleoylcarnitine (C18:1)	1498	Lipid	Fatty Acid Metabolism(Acyl Carnitine)	35160	100001501	LC/MS Neg	6410	500.359	38677-66-6	6441392	21403150		HMDB05065	0
ophthalmate	456	Amino Acid	Glutathione Metabolism	34592	100001311	LC/MS Pos	1462	290.135	495-27-2	7018721	7993181		HMDB05765	0
ornithine	375	Amino Acid	Urea cycle; Arginine and Proline Metabolism	1493	444	LC/MS Pos	614	133.097	3184-13-2	6262	6026	C00077	HMDB03374	0
oxalate (ethanedioate)	3658	Cofactors and Vitamins	Ascorbate and Aldarate Metabolism	20694	100000841	LC/MS Neg	603	88.988	144-62-7	971	946	C00209	HMDB02329	0
p-cresol glucuronide*	189	Amino Acid	Tyrosine Metabolism	48841	100006191	LC/MS Neg	2420	283.082	17680-99-8	154035	135751		HMDB11686	44.4444
p-cresol sulfate	3820	Xenobiotics	Benzoate Metabolism	36103	100001315	LC/MS Neg	2890	187.007	3233-57-7	4615423	3806480		HMDB11635	0
palmitamide (16:0)	1420	Lipid	Fatty Acid, Amide	42095	100003915	LC/MS Pos	5738	256.263	629-54-9	69421	62629		HMDB12273	0
palmitate (16:0)	1212	Lipid	Long Chain Fatty Acid	1336	424	LC/MS Neg	5618	255.233	57-10-3	985	960	C00249	HMDB00220	0
palmitoleate (16:1n7)	1213	Lipid	Long Chain Fatty Acid	33447	452	LC/MS Neg	5475	253.217	373-49-9	445638	393216	C08362	HMDB03229	0
palmitoyl ethanolamide	1715	Lipid	Endocannabinoid	38165	1489	LC/MS Neg	6300	298.275	544-31-0	4671	4509	C16512	HMDB02100	0
palmitoylcarnitine (C16)	1492	Lipid	Fatty Acid Metabolism(Acyl Carnitine)	44681	100000776	LC/MS Neg	6252	474.344	6865-14-1	461	448	C02990	HMDB00222	0
pantothenate	3642	Cofactors and Vitamins	Pantothenate and CoA Metabolism	1508	1024	LC/MS Neg	1498.7	218.103	137-08-6	6613	6361	C00864	HMDB00210	0
paraxanthine	3839	Xenobiotics	Xanthine Metabolism	18254	100000453	LC/MS Pos	2443.3	181.072	611-59-6	4687	4525	C13747	HMDB01860	0
pelargonate (9:0)	1199	Lipid	Medium Chain Fatty Acid	12035	437	LC/MS Neg	4798	157.123	112-05-0	8158	4574394	C01601	HMDB00847	0
pentadecanoate (15:0)	1211	Lipid	Long Chain Fatty Acid	1361	980	LC/MS Neg	5521	241.217	1002-84-2;10002-84-2	13849	13249	C16537	HMDB00826	5.55556
perfluorooctanesulfonate (PFOS)	4918	Xenobiotics	Chemical	57564	100010955	LC/MS Neg	5233	498.93	1763-23-1	74483	67068	C18142	HMDB59586	11.1111
phenol sulfate	154	Amino Acid	Tyrosine Metabolism	32553	100001510	LC/MS Neg	2156	172.991	937-34-8	74426	67018	C02180	HMDB60015	0
phenylacetylglutamate	925	Peptide	Acetylated Peptides	52925	100009045	LC/MS Neg	1630	264.088		11579826	9754592		HMDB59772	5.55556
phenylacetylglutamine	926	Peptide	Acetylated Peptides	35126	100001417	LC/MS Pos	2875	265.118	28047-15-6	92258	270643	C04148	HMDB06344	0
phenylalanine	120	Amino Acid	Phenylalanine Metabolism	64	460	LC/MS Pos	2050	166.086	63-91-2	6140	5910	C00079	HMDB00159	0
phenylalanylalanine	733	Peptide	Dipeptide	41374	100003589	LC/MS Pos	2120	237.123	3918-87-4	5488196	4589716			0
phenylalanylglycine	737	Peptide	Dipeptide	41370	100003588	LC/MS Pos	2155	223.108	721-90-4	98207	88678		HMDB28995	0
phenyllactate (PLA)	126	Amino Acid	Phenylalanine Metabolism	22130	100000774	LC/MS Neg	2208	165.056	828-01-3	3848	3715	C05607	HMDB00779	0
phosphate	1178	Energy	Oxidative Phosphorylation	42109	461	LC/MS Neg	608	96.9696	7664-38-2	1061	1032	C00009	HMDB01429	0
phosphoenolpyruvate (PEP)	973	Carbohydrate	Glycolysis, Gluconeogenesis, and Pyruvate Metabolism	597	463	LC/MS Neg	587.3	166.975	10526-80-4	1005	980	C00074	HMDB00263	5.55556
phosphoethanolamine	1782	Lipid	Phospholipid Metabolism	1600	1026	LC/MS Neg	638	140.012	1071-23-4	1015	990	C00346	HMDB00224	0
phosphopantetheine	3644	Cofactors and Vitamins	Pantothenate and CoA Metabolism	15504	100000328	LC/MS Neg	1597	357.089		987	103123	C01134	HMDB01416	0
pipecolate	113	Amino Acid	Lysine Metabolism	1444	1025	LC/MS Pos	1120	130.086	4043-87-2	849	826	C00408	HMDB00070	0
piperine	4157	Xenobiotics	Food Component/Plant	33935	100001267	LC/MS Pos	5135	286.144	94-62-2	638024	553590	C03882	HMDB29377	0
pregnenediol disulfate (C21H34O8S2)*	2679	Lipid	Pregnenolone Steroids	32562	100001993	LC/MS Neg	3868	238.077						0
pregnenediol sulfate (C21H34O5S)*	2680	Lipid	Pregnenolone Steroids	32619	100002067	LC/MS Neg	5000	397.205	1247-64-9		13465233			0
pregnenolone sulfate	2663	Lipid	Pregnenolone Steroids	38170	100002129	LC/MS Neg	5100	395.19	1247-64-9	105074	94802		HMDB00774	27.7778
pro-hydroxy-pro	399	Amino Acid	Urea cycle; Arginine and Proline Metabolism	35127	100001167	LC/MS Pos	950	229.118	18684-24-7	11673055	9847785		HMDB06695	0
proline	383	Amino Acid	Urea cycle; Arginine and Proline Metabolism	1898	480	LC/MS Pos	805	116.071	147-85-3	145742	128566	C00148	HMDB00162	0
prolylglycine	756	Peptide	Dipeptide	40703	100003674	LC/MS Pos	875	173.092	2578-57-6	6426709	4932143		HMDB11178	0
propionylcarnitine (C3)	1444	Lipid	Fatty Acid Metabolism (also BCAA Metabolism)	32452	100001162	LC/MS Pos	1590	218.139	17298-37-2	107738	96904	C03017	HMDB00824	0
pseudouridine	3540	Nucleotide	Pyrimidine Metabolism, Uracil containing	33442	821	LC/MS Neg	1100	243.062	1445-07-4	15047	21403010	C02067	HMDB00767	0
pyridoxal phosphate	3744	Cofactors and Vitamins	Vitamin B6 Metabolism	5331	492	LC/MS Neg	943	246.017	41468-25-1	1051	1022	C00018	HMDB01491	0
pyridoxate	3746	Cofactors and Vitamins	Vitamin B6 Metabolism	31555	100001121	LC/MS Neg	2185	182.046	82-82-6	6723	6467	C00847	HMDB00017	0
pyroglutamine*	51	Amino Acid	Glutamate Metabolism	46225	100001540	LC/MS Pos	750	129.066	2353-44-8	134508	118562			0
pyroglutamylisoleucine*	944	Peptide	Modified Peptides	62094	100020235	LC/MS Pos	3076	243.134						16.6667
pyroglutamylleucine*	945	Peptide	Modified Peptides	62096	100020234	LC/MS Pos	3214	243.134						5.55556
pyroglutamyllysine*	946	Peptide	Modified Peptides	62088	100020228	LC/MS Pos	965	258.145						66.6667
pyrraline	4264	Xenobiotics	Food Component/Plant	48428	100001767	LC/MS Neg	2304	253.119	74509-14-1	122228	19980286		HMDB33143	0
pyruvate	974	Carbohydrate	Glycolysis, Gluconeogenesis, and Pyruvate Metabolism	42582	823	LC/MS Neg	732.4	87.0088	127-17-3	1060	96901	C00022	HMDB00243	0
quinate	4186	Xenobiotics	Food Component/Plant	18335	100000442	LC/MS Neg	648	191.056	77-95-2	6508	10246715	C00296	HMDB03072	0
riboflavin (Vitamin B2)	3639	Cofactors and Vitamins	Riboflavin Metabolism	1827	500	LC/MS Pos	3098.3	377.146	83-88-5	493570	431981	C00255	HMDB00244	0
ribose/ribulose/xylulose/arabinose 5-phosphate	989	Carbohydrate	Pentose Phosphate Pathway	46143	100021088	LC/MS Neg	605	229.012						0
S-adenosylhomocysteine (SAH)	343	Amino Acid	Methionine, Cysteine, SAM and Taurine Metabolism	42382	197	LC/MS Neg	1832.4	383.114	979-92-0	439155	16788012	C00021	HMDB00939	0
S-adenosylmethionine (SAM)	342	Amino Acid	Methionine, Cysteine, SAM and Taurine Metabolism	15915	1263	LC/MS Pos	670	399.145	24346-00-7;86867-01-8;86867-0108	34756		C00019	HMDB01185	0
S-lactoylglutathione	447	Amino Acid	Glutathione Metabolism	15731	1343	LC/MS Neg	1248	378.098	54398-03-7	440018	1053	C03451	HMDB01066	0
S-methylcysteine	353	Amino Acid	Methionine, Cysteine, SAM and Taurine Metabolism	39592	100002749	LC/MS Pos	848	119.016	1187-84-4	24417	22826		HMDB02108	0
S-methylglutathione	446	Amino Acid	Glutathione Metabolism	33944	100001259	LC/MS Pos	1600	322.107	2922-56-7	3605667	2841309	C11347		0
S-nitrosoglutathione (GSNO)	458	Amino Acid	Glutathione Metabolism	47127	100004662	LC/MS Pos	1748	337.081	57564-91-7	3514	3394		HMDB04645	0
saccharopine	104	Amino Acid	Lysine Metabolism	1495	392	LC/MS Neg	640	275.125	997-68-2	160556	141086	C00449	HMDB00279	0
salicylate	4744	Xenobiotics	Drug - Topical Agents	1515	501	LC/MS Neg	2195	137.024	69-72-7	338	331	C00805	HMDB01895	0
sebacate (C10-DC)	1367	Lipid	Fatty Acid, Dicarboxylate	32398	100001211	LC/MS Neg	1788	201.113	111-20-6	5192	5004	C08277	HMDB00792	0
serine	9	Amino Acid	Glycine, Serine and Threonine Metabolism	1648	503	LC/MS Pos	676.7	106.05	56-45-1	5951	5736	C00065	HMDB00187	0
spermidine	421	Amino Acid	Polyamine Metabolism	485	50	LC/MS Pos	533.5	146.165	124-20-9	1102	1071	C00315	HMDB01257	0
spermine	426	Amino Acid	Polyamine Metabolism	603	507	LC/MS Pos	500.4	203.223	71-44-3	1103	1072	C00750	HMDB01256	16.6667
sphingosine	2586	Lipid	Sphingosines	17747	297	LC/MS Pos	5179.9	300.29	123-78-4	5353955	4510275	C00319	HMDB00252	0
stachydrine	4211	Xenobiotics	Food Component/Plant	34384	100001296	LC/MS Pos	838.7	144.102	4136-37-2	115244	103115	C10172	HMDB04827	0
stearate (18:0)	1218	Lipid	Long Chain Fatty Acid	1358	439	LC/MS Neg	5872	283.264	57-11-4	5281	5091	C01530	HMDB00827	0
stearoylcarnitine (C18)	1494	Lipid	Fatty Acid Metabolism(Acyl Carnitine)	34409	100001391	LC/MS Neg	6980	502.375	18822-91-8	6426855	21233653		HMDB00848	0
succinate	1162	Energy	TCA Cycle	1437	252	LC/MS Pos	1558	101.023	110-15-6	1110	1078	C00042	HMDB00254	0
succinylcarnitine (C4-DC)	1161	Energy	TCA Cycle	37058	100001948	LC/MS Pos	1419	262.129	256928-74-2	71464481	28639166		HMDB61717	0
sulfate*	4820	Xenobiotics	Chemical	46960	100002528	LC/MS Neg	616	96.9601	14808-79-8	1118	1086	C00059	HMDB01448	0
taurine	364	Amino Acid	Methionine, Cysteine, SAM and Taurine Metabolism	2125	512	LC/MS Pos	692	126.022	107-35-7	1123	1091	C00245	HMDB00251	0
taurochenodeoxycholate	2817	Lipid	Primary Bile Acid Metabolism	18494	1629	LC/MS Neg	5250	498.289	6009-98-9	387316	343282	C05465	HMDB00951	0
taurocholate	2814	Lipid	Primary Bile Acid Metabolism	18497	1648	LC/MS Neg	5150	514.284	145-42-6	6675		C05122	HMDB00036	5.55556
taurocholenate sulfate*	2869	Lipid	Secondary Bile Acid Metabolism	32807	100001990	LC/MS Neg	4750	279.614						0
taurocyamine	367	Amino Acid	Methionine, Cysteine, SAM and Taurine Metabolism	35117	100001418	LC/MS Neg	734	166.029	543-18-0	68340	61635	C01959	HMDB03584	0
taurodeoxycholate	2835	Lipid	Secondary Bile Acid Metabolism	12261	1668	LC/MS Neg	5257.4	498.289	207737-97-1	2733768	2015539	C05463	HMDB00896	0
taurolithocholate 3-sulfate	2844	Lipid	Secondary Bile Acid Metabolism	36850	100001658	LC/MS Neg	5027	280.622	64936-83-0	440071	389078	C03642	HMDB02580	5.55556
tetradecadienoate (14:2)*	1247	Lipid	Polyunsaturated Fatty Acid (n3 and n6)	62850	100020343	LC/MS Neg	5292	223.17	39039-37-7	5312409	4471834		HMDB00560	0
tetradecanedioate (C14-DC)	1372	Lipid	Fatty Acid, Dicarboxylate	35669	100001613	LC/MS Neg	4000	257.176	821-38-5	13185	12630		HMDB00872	0
theobromine	3840	Xenobiotics	Xanthine Metabolism	18392	100000445	LC/MS Pos	2151	181.072	83-67-0	5429	5236	C07480	HMDB02825	0
theophylline	3841	Xenobiotics	Xanthine Metabolism	18394	100000437	LC/MS Neg	2356.9	179.057	58-55-9	2153	2068	C07130	HMDB01889	0
thiamin diphosphate	3720	Cofactors and Vitamins	Thiamine Metabolism	35670	522	LC/MS Neg	1195.1	423.03	154-87-0	1132	8715	C00068	HMDB01372	16.6667
threonine	16	Amino Acid	Glycine, Serine and Threonine Metabolism	1284	564	LC/MS Pos	701.5	120.066	72-19-5	6288	6051	C00188	HMDB00167	0
threonylphenylalanine	794	Peptide	Dipeptide	31530	100001125	LC/MS Pos	2452	267.134	16875-27-7	4099799	3313819		HMDB29068	0
thymol sulfate	4223	Xenobiotics	Food Component/Plant	36095	100001757	LC/MS Neg	4410	229.054	89-83-8		10709958	C09908	HMDB01878	22.2222
tiglylcarnitine (C5:1-DC)	306	Amino Acid	Leucine, Isoleucine and Valine Metabolism	35428	100001597	LC/MS Pos	2354	244.154	64191-86-2	22833596	17216200		HMDB02366	0
trans-4-hydroxyproline	397	Amino Acid	Urea cycle; Arginine and Proline Metabolism	32306	1001	LC/MS Pos	685	132.066	51-35-4	5810	5605	C01157	HMDB00725	0
trans-nonadecenoate (tr 19:1)*	1230	Lipid	Long Chain Fatty Acid	57485	100015805	LC/MS Neg	5824	295.264						0
trigonelline (N'-methylnicotinate)	3632	Cofactors and Vitamins	Nicotinate and Nicotinamide Metabolism	32401	100001092	LC/MS Pos	771.8	138.055	535-83-1	5570	5369	C01004	HMDB00875	0
tryptophan	210	Amino Acid	Tryptophan Metabolism	54	565	LC/MS Pos	2440	205.097	73-22-3	6305	6066	C00078	HMDB00929	0
tryptophan betaine	219	Amino Acid	Tryptophan Metabolism	37097	100001743	LC/MS Pos	2466	247.144	20671-76-5	442106	390633	C09213	HMDB61115	0
tyrosine	137	Amino Acid	Tyrosine Metabolism	1299	815	LC/MS Pos	1516.3	182.081	60-18-4	6057	5833	C00082	HMDB00158	0
tyrosylglycine	820	Peptide	Dipeptide	41375	100003598	LC/MS Pos	1605	239.103	673-05-5	259323	227627		HMDB29105	0
UDP-glucuronate	1105	Carbohydrate	Nucleotide Sugar	2763	1097	LC/MS Neg	588	579.027	28053-08-9;63700-19-6	17473	16522	C00167	HMDB00935	27.7778
undecanedioate (C11-DC)	1368	Lipid	Fatty Acid, Dicarboxylate	42395	100001617	LC/MS Neg	2440	215.129	1852-04-6	15816	15037		HMDB00888	0
uracil	3539	Nucleotide	Pyrimidine Metabolism, Uracil containing	605	825	LC/MS Pos	1152.2	113.035	66-22-8	1174	1141	C00106	HMDB00300	5.55556
urate	3455	Nucleotide	Purine Metabolism, (Hypo)Xanthine/Inosine containing	1604	1134	LC/MS Neg	757.1	167.021	69-93-2;120K5305	1175		C00366	HMDB00289	0
uridine	3538	Nucleotide	Pyrimidine Metabolism, Uracil containing	606	535	LC/MS Neg	1457.6	243.062	58-96-8	6029	5807	C00299	HMDB00296	0
uridine 5'-diphosphate (UDP)	3532	Nucleotide	Pyrimidine Metabolism, Uracil containing	5345	870	LC/MS Neg	599.5	402.995	21931-53-3	6031	5809	C00015	HMDB00295	5.55556
uridine 5'-monophosphate (UMP)	3533	Nucleotide	Pyrimidine Metabolism, Uracil containing	2856	869	LC/MS Neg	627	323.029	3387-36-8	6030	1399139	C00105	HMDB00288	0
valerate (5:0)	1195	Lipid	Short Chain Fatty Acid	33443	1136	LC/MS Neg	1718	101.061	109-52-4	7991	7701	C00803	HMDB00892	0
valerylcarnitine (C5)	1479	Lipid	Fatty Acid Metabolism(Acyl Carnitine)	34406	100001394	LC/MS Pos	2555	246.17	40225-14-7	6426903	4932322		HMDB13128	0
valerylglycine	1458	Lipid	Fatty Acid Metabolism(Acyl Glycine)	36768	100001451	LC/MS Neg	2071	158.082	24003-66-5	4737557	3924818		HMDB00927	0
valine	318	Amino Acid	Leucine, Isoleucine and Valine Metabolism	1649	566	LC/MS Pos	1042.1	118.086	72-18-4	6287	6050	C00183	HMDB00883	0
valsartan	4598	Xenobiotics	Drug - Cardiovascular	48566	100006232	LC/MS Neg	4228	434.22	137862-53-4	5650	5448			88.8889
valylglutamine	836	Peptide	Dipeptide	42079	100003640	LC/MS Pos	1100	246.145	42854-54-6	5253209	4419671		HMDB29125	0
valylglycine	837	Peptide	Dipeptide	40475	100003641	LC/MS Pos	1372	175.108	686-43-1	136487	120256		HMDB29127	0
valylleucine	840	Peptide	Dipeptide	39994	100003210	LC/MS Pos	2562	231.17	22906-55-4	352039	312586		HMDB29131	0
xanthine	3447	Nucleotide	Purine Metabolism, (Hypo)Xanthine/Inosine containing	3147	1004	LC/MS Neg	910	151.026	69-89-6	1188	1151	C00385	HMDB00292	0
xanthosine	3449	Nucleotide	Purine Metabolism, (Hypo)Xanthine/Inosine containing	15136	100000299	LC/MS Pos	1827	285.083	146-80-5	64959	58484	C01762	HMDB00299	0
X - 07765	NA	NA	NA	46590	NA	LC/MS Neg	3698	245.048						83.3333
X - 09789	NA	NA	NA	46355	NA	LC/MS Neg	2580.5	153.02						0
X - 10445	NA	NA	NA	47680	NA	LC/MS Pos	1962	250.093						0
X - 10457	NA	NA	NA	47581	NA	LC/MS Pos	1528	261.144						0
X - 11261	NA	NA	NA	32578	NA	LC/MS Pos	3730	286.201						0
X - 11299	NA	NA	NA	46592	NA	LC/MS Neg	4886	507.222						0
X - 11308	NA	NA	NA	46390	NA	LC/MS Neg	5163	365.27						0
X - 11315	NA	NA	NA	46609	NA	LC/MS Pos	1210	130.086						0
X - 11372	NA	NA	NA	46594	NA	LC/MS Neg	5319	467.373						0
X - 11381	NA	NA	NA	32698	NA	LC/MS Pos	1111	186.112						0
X - 11407	NA	NA	NA	46596	NA	LC/MS Neg	2108	186.113						0
X - 11440	NA	NA	NA	46599	NA	LC/MS Neg	3515	246.074						0
X - 11441	NA	NA	NA	46360	NA	LC/MS Neg	3755.8	331.131						83.3333
X - 11442	NA	NA	NA	46443	NA	LC/MS Neg	3890	331.13						83.3333
X - 11444	NA	NA	NA	46460	NA	LC/MS Neg	3972	541.265						0
X - 11470	NA	NA	NA	46601	NA	LC/MS Neg	4151	525.271						11.1111
X - 11478	NA	NA	NA	46602	NA	LC/MS Neg	4285	165.092						0
X - 11580	NA	NA	NA	47479	NA	LC/MS Neg	1406	662.159						0
X - 11787	NA	NA	NA	33132	NA	LC/MS Pos	1113	148.097						0
X - 11795	NA	NA	NA	33140	NA	LC/MS Pos	1478.6	148.097						0
X - 11805	NA	NA	NA	46509	NA	LC/MS Pos	1845	418.193						0
X - 11843	NA	NA	NA	46466	NA	LC/MS Neg	2674.6	230.013						33.3333
X - 11850	NA	NA	NA	46507	NA	LC/MS Neg	3176	226.018						33.3333
X - 11880	NA	NA	NA	46608	NA	LC/MS Neg	5341	537.416						16.6667
X - 12007	NA	NA	NA	46610	NA	LC/MS Neg	1357	222.992						0
X - 12015	NA	NA	NA	47390	NA	LC/MS Neg	1296	216.088						0
X - 12056	NA	NA	NA	33408	NA	LC/MS Pos	1127.5	156.077						0
X - 12096	NA	NA	NA	47686	NA	LC/MS Pos	1584	174.124						0
X - 12097	NA	NA	NA	47685	NA	LC/MS Pos	1539	174.124						38.8889
X - 12100	NA	NA	NA	47687	NA	LC/MS Pos	1790	221.092						0
X - 12104	NA	NA	NA	46932	NA	LC/MS Pos	1750	271.092						0
X - 12115	NA	NA	NA	47693	NA	LC/MS Pos	1599	260.149						0
X - 12206	NA	NA	NA	46612	NA	LC/MS Neg	622	254.982						0
X - 12216	NA	NA	NA	46613	NA	LC/MS Neg	1691	227.997						0
X - 12234	NA	NA	NA	47536	NA	LC/MS Pos	1936	297.108						11.1111
X - 12329	NA	NA	NA	47659	NA	LC/MS Neg	1854	188.003						16.6667
X - 12407	NA	NA	NA	46615	NA	LC/MS Neg	1873	204.981						11.1111
X - 12425	NA	NA	NA	47199	NA	LC/MS Neg	743	307.151						0
X - 12544	NA	NA	NA	34112	NA	LC/MS Pos	4351.1	211.096						5.55556
X - 12680	NA	NA	NA	47201	NA	LC/MS Neg	1054	227.115						0
X - 12689	NA	NA	NA	47719	NA	LC/MS Pos	1157	278.123						0
X - 12798	NA	NA	NA	46624	NA	LC/MS Pos	1870	240.102						0
X - 12953	NA	NA	NA	47614	NA	LC/MS Pos	1535	388.109						0
X - 13007	NA	NA	NA	47203	NA	LC/MS Neg	4597	329.234						0
X - 13553	NA	NA	NA	47959	NA	LC/MS Neg	1407	263.023						33.3333
X - 13658	NA	NA	NA	47664	NA	LC/MS Neg	4643	253.083						22.2222
X - 13728	NA	NA	NA	46645	NA	LC/MS Neg	1589	197.068						0
X - 13743	NA	NA	NA	47794	NA	LC/MS Pos	2404	276.18						0
X - 13835	NA	NA	NA	46646	NA	LC/MS Neg	1017	169.062						0
X - 13871	NA	NA	NA	47442	NA	LC/MS Pos	987	192.032						0
X - 14056	NA	NA	NA	46632	NA	LC/MS Pos	923	192.033						11.1111
X - 14193	NA	NA	NA	47451	NA	LC/MS Pos	1812	283.129						0
X - 14318	NA	NA	NA	47475	NA	LC/MS Pos	2516	247.129						0
X - 14352	NA	NA	NA	47476	NA	LC/MS Pos	2640	247.129						0
X - 14380	NA	NA	NA	47494	NA	LC/MS Pos	2858	360.212						38.8889
X - 14904	NA	NA	NA	47204	NA	LC/MS Neg	4543	329.234						0
X - 14908	NA	NA	NA	47240	NA	LC/MS Neg	3444	354.204						94.4444
X - 15136	NA	NA	NA	47619	NA	LC/MS Pos	4054	243.087						0
X - 15161	NA	NA	NA	47620	NA	LC/MS Pos	1494	206.048						0
X - 15166	NA	NA	NA	47520	NA	LC/MS Pos	1764	280.129						0
X - 15168	NA	NA	NA	47521	NA	LC/MS Pos	1869	294.144						0
X - 15220	NA	NA	NA	46658	NA	LC/MS Neg	2662	274.112						0
X - 15375	NA	NA	NA	46943	NA	LC/MS Pos	2576	328.126						0
X - 15382	NA	NA	NA	46941	NA	LC/MS Pos	2535	271.104						0
X - 15469	NA	NA	NA	46640	NA	LC/MS Pos	3447	304.212						0
X - 15484	NA	NA	NA	46940	NA	LC/MS Pos	2492	271.104						0
X - 15562	NA	NA	NA	47628	NA	LC/MS Pos	4659	470.202						0
X - 15563	NA	NA	NA	47631	NA	LC/MS Pos	4721	490.171						5.55556
X - 15664	NA	NA	NA	46664	NA	LC/MS Neg	3733	469.172						27.7778
X - 15678	NA	NA	NA	47645	NA	LC/MS Pos	1762	249.054						0
X - 15680	NA	NA	NA	47534	NA	LC/MS Pos	1855	297.108						5.55556
X - 16124	NA	NA	NA	46461	NA	LC/MS Neg	2563.6	203.002						11.1111
X - 16129	NA	NA	NA	46642	NA	LC/MS Pos	1485	287.651						5.55556
X - 16394	NA	NA	NA	38963	NA	LC/MS Pos	1688.8	229.154						0
X - 16576	NA	NA	NA	46673	NA	LC/MS Neg	4496	167.108						27.7778
X - 16648	NA	NA	NA	47574	NA	LC/MS Pos	1049	130.602						77.7778
X - 16932	NA	NA	NA	46680	NA	LC/MS Neg	3953	469.172						22.2222
X - 17010	NA	NA	NA	47993	NA	LC/MS Neg	3178	189.114						0
X - 17138	NA	NA	NA	47648	NA	LC/MS Pos	4093	310.201						5.55556
X - 17185	NA	NA	NA	46490	NA	LC/MS Neg	3079.5	215.002						0
X - 17269	NA	NA	NA	46704	NA	LC/MS Neg	4538	155.108						0
X - 17299	NA	NA	NA	40097	NA	LC/MS Pos	1282	229.154						0
X - 17654	NA	NA	NA	46709	NA	LC/MS Neg	5200	365.269						50
X - 17717	NA	NA	NA	47827	NA	LC/MS Pos	2598	304.15						0
X - 18039	NA	NA	NA	47598	NA	LC/MS Pos	2212	399.235						83.3333
X - 18345	NA	NA	NA	47342	NA	LC/MS Neg	1400	245.114						5.55556
X - 18371	NA	NA	NA	47838	NA	LC/MS Pos	1876	265.085						5.55556
X - 18779	NA	NA	NA	46687	NA	LC/MS Neg	1969	209.045						0
X - 18899	NA	NA	NA	47670	NA	LC/MS Neg	3730	337.143						38.8889
X - 18921	NA	NA	NA	47671	NA	LC/MS Neg	4870	193.124						33.3333
X - 18938	NA	NA	NA	48050	NA	LC/MS Neg	2240	245.14						55.5556
X - 21258	NA	NA	NA	46259	NA	LC/MS Neg	3915	213.023						0
X - 21319	NA	NA	NA	46363	NA	LC/MS Neg	4238.4	165.092						44.4444
X - 21327	NA	NA	NA	46371	NA	LC/MS Neg	4814	329.234						88.8889
X - 21342	NA	NA	NA	46387	NA	LC/MS Neg	5149	385.166						0
X - 21353	NA	NA	NA	46398	NA	LC/MS Neg	5196	239.166						0
X - 21410	NA	NA	NA	46455	NA	LC/MS Neg	3921	385.17						0
X - 21431	NA	NA	NA	46476	NA	LC/MS Pos	3215	146.06						0
X - 21453	NA	NA	NA	46498	NA	LC/MS Pos	1807	207.017						0
X - 21457	NA	NA	NA	46502	NA	LC/MS Pos	1815	127.05						0
X - 21470	NA	NA	NA	46515	NA	LC/MS Neg	3249	232.059						44.4444
X - 21477	NA	NA	NA	46522	NA	LC/MS Pos	1894	199.108						0
X - 21607	NA	NA	NA	46674	NA	LC/MS Neg	4529	167.108						11.1111
X - 21628	NA	NA	NA	46696	NA	LC/MS Neg	2270	697.263						0
X - 21729	NA	NA	NA	46898	NA	LC/MS Neg	1024	87.0453						0
X - 21769	NA	NA	NA	46942	NA	LC/MS Pos	2555	250.013						0
X - 21785	NA	NA	NA	46961	NA	LC/MS Neg	765	189.041						0
X - 21796	NA	NA	NA	46972	NA	LC/MS Neg	1625	138.057						0
X - 21891	NA	NA	NA	47071	NA	LC/MS Neg	4894	524.243						0
X - 22154	NA	NA	NA	47409	NA	LC/MS Pos	2675	281.113						0
X - 22155	NA	NA	NA	47410	NA	LC/MS Pos	2763	281.113						27.7778
X - 22415	NA	NA	NA	47679	NA	LC/MS Pos	1884	162.058						22.2222
X - 22507	NA	NA	NA	47771	NA	LC/MS Pos	4035	310.201						33.3333
X - 22517	NA	NA	NA	47781	NA	LC/MS Pos	3948	310.201						27.7778
X - 22518	NA	NA	NA	47782	NA	LC/MS Pos	4134	310.201						44.4444
X - 22519	NA	NA	NA	47783	NA	LC/MS Pos	3545	304.211						0
X - 22590	NA	NA	NA	47858	NA	LC/MS Pos	2522	304.15						0
X - 22767	NA	NA	NA	48072	NA	LC/MS Neg	1365	572.081						38.8889
X - 22772	NA	NA	NA	48077	NA	LC/MS Neg	2465	188.039						0
X - 22775	NA	NA	NA	48080	NA	LC/MS Neg	2980	154.991						0
X - 22776	NA	NA	NA	48081	NA	LC/MS Neg	3615	252.044						0
X - 22806	NA	NA	NA	48111	NA	LC/MS Neg	5695	212.203						5.55556
X - 23196	NA	NA	NA	48892	NA	LC/MS Neg	1392	217.108						0
X - 23240	NA	NA	NA	48936	NA	LC/MS Neg	2838	261.134						0
X - 23314	NA	NA	NA	49014	NA	LC/MS Neg	1578.3	207.087						0
X - 23369	NA	NA	NA	49228	NA	LC/MS Neg	2150	188.035						0
X - 23537	NA	NA	NA	49413	NA	LC/MS Pos	2160.5	170.081						0
X - 24293	NA	NA	NA	52441	NA	LC/MS Neg	1602	207.087						72.2222
X - 24309	NA	NA	NA	52504	NA	LC/MS Neg	4430	321.148						27.7778
X - 24369	NA	NA	NA	52565	NA	LC/MS Pos	1446.8	259.104						5.55556
X - 24375	NA	NA	NA	52571	NA	LC/MS Pos	1753.6	182.067						5.55556
X - 24748	NA	NA	NA	53267	NA	LC/MS Neg	4596	321.147						44.4444
X - 24813	NA	NA	NA	54841	NA	LC/MS Neg	1286	202.048						0
X - 24947	NA	NA	NA	57714	NA	LC/MS Neg	4518	387.185						27.7778
X - 24948	NA	NA	NA	57715	NA	LC/MS Neg	4746	413.2						0
X - 24952	NA	NA	NA	57719	NA	LC/MS Neg	5310	413.197						0
X - 24972	NA	NA	NA	57756	NA	LC/MS Neg	3880	385.169						0

## Sheet: Table S3
Supplementary Table S3: Response to acute exercise; results from paired t-test, comparing metabolite levels (log2-transformed) at 45 min after the first bout of (unaccustomed) resistance exercise; bold letters indicate significance after multiple testing correction (FDR<0.33); italic letters indicate changes at p<0.05.
Metabolite name	log2 fold change	p-value	q-value
3-(4-hydroxyphenyl)lactate	0.947567	0.000403368	0.163761
xanthosine	2.83891	0.00054149	0.163761
CoA-glutathione*	-0.954244	0.000806704	0.163761
1-carboxyethylvaline	1.21536	0.00140969	0.214625
N1-Methyl-2-pyridone-5-carboxamide	0.599752	0.00201794	0.22224
3-methylhistidine	1.24036	0.00218955	0.22224
chenodeoxycholate	0.917679	0.00305521	0.265803
X - 11299	1.31378	0.0106422	0.737506
glutamate	-0.827662	0.0118465	0.737506
N6,N6,N6-trimethyllysine	-0.523584	0.014013	0.737506
coenzyme A	-0.933834	0.0140422	0.737506
cytidine 5'-monophospho-N-acetylneuraminic acid	-0.552964	0.0145321	0.737506
sulfate*	0.327763	0.0201187	0.845935
glucuronide of piperine metabolite C17H21NO3 (4)*	1.08506	0.0220989	0.845935
undecanedioate (C11-DC)	-0.432083	0.0223237	0.845935
arginine	-0.35796	0.0238853	0.845935
inosine 5'-monophosphate (IMP)	-0.435348	0.0262263	0.845935
1-linoleoyl-GPE (18:2)*	-0.267668	0.0274514	0.845935
guanosine 5'- monophosphate (5'-GMP)	0.387549	0.0274672	0.845935
X - 15680	-0.645007	0.0293037	0.845935
glycerophosphorylcholine (GPC)	0.343184	0.0303889	0.845935
thiamin diphosphate	-0.772509	0.0326363	0.845935
sebacate (C10-DC)	-0.283784	0.0373159	0.845935
6-phosphogluconate	0.486832	0.0377458	0.845935
4-nitrophenol	-0.303192	0.0390526	0.845935
azelate (C9-DC)	-0.36349	0.0394387	0.845935
X - 24948	0.429976	0.0407136	0.845935
X - 12689	-0.958762	0.0433786	0.845935
2-aminoadipate	-0.935991	0.0482515	0.845935
hypoxanthine	0.365826	0.0489551	0.845935
xanthine	0.41843	0.0495244	0.845935
3-hydroxybutyrylcarnitine (2)	1.86544	0.0495632	0.845935
ornithine	-0.422234	0.049743	0.845935
methionine	0.231292	0.0508896	0.845935
X - 21470	0.724368	0.0519994	0.845935
lysine	-0.258583	0.0525861	0.845935
2-palmitoylglycerol (16:0)	-0.562975	0.0533029	0.845935
pregnenolone sulfate	0.632845	0.0537239	0.845935
1-oleoyl-GPG (18:1)*	0.398334	0.0544377	0.845935
X - 18899	0.675073	0.057251	0.845935
uridine	0.225379	0.0584757	0.845935
carnitine	-0.227326	0.0586332	0.845935
X - 11308	0.481826	0.0600375	0.845935
benzoate	-0.257711	0.0611184	0.845935
4-methylcatechol sulfate	-0.810857	0.0626113	0.84734
X - 13728	-0.47038	0.0697788	0.86402
argininate*	-0.442456	0.0742802	0.86402
tetradecanedioate (C14-DC)	-0.392987	0.0787265	0.86402
dimethylarginine (SDMA + ADMA)	-0.439157	0.0789524	0.86402
X - 11843	1.94131	0.0789958	0.86402
X - 18345	-0.376472	0.0803453	0.86402
X - 15136	-0.38859	0.0805356	0.86402
imidazole propionate	0.598423	0.0808185	0.86402
1-carboxyethylphenylalanine	1.43956	0.0846108	0.86402
pyrraline	-0.98011	0.0852982	0.86402
N-formylmethionine	0.210057	0.0870974	0.86402
adenosine 3'-monophosphate (3'-AMP)	1.51006	0.0910865	0.86402
oleate/vaccenate (18:1)	-0.171853	0.0930496	0.86402
cholate	1.41058	0.0942867	0.86402
3-hydroxyindolin-2-one	-0.459208	0.0965983	0.86402
S-adenosylhomocysteine (SAH)	0.422865	0.0982111	0.86402
N-delta-acetylornithine	-0.438363	0.0984796	0.86402
myristate (14:0)	-0.147184	0.0998242	0.86402
3-methylglutarylcarnitine (1)	-0.424203	0.100062	0.86402
X - 17717	-0.507551	0.100379	0.86402
3'-dephosphocoenzyme A	-0.614162	0.101325	0.86402
N-acetyl-isoputreanine*	-0.327838	0.102452	0.86402
X - 15469	0.937111	0.103106	0.86402
propionylcarnitine (C3)	0.250964	0.104757	0.86402
malate	-0.32137	0.10489	0.86402
myristoleate (14:1n5)	-0.377985	0.105546	0.86402
N-acetylmethionine sulfoxide	-0.72536	0.106923	0.86402
p-cresol glucuronide*	-0.965376	0.107252	0.86402
X - 18371	-0.755383	0.109798	0.86402
X - 09789	-0.477638	0.110189	0.86402
alpha-ketoglutaramate*	-0.263445	0.111519	0.86402
1-carboxyethylleucine	1.03659	0.112023	0.86402
AICA ribonucleotide	0.523438	0.112042	0.86402
3'-dephospho-CoA-glutathione*	-0.726259	0.113964	0.86402
pentadecanoate (15:0)	-0.137497	0.114427	0.86402
3-hydroxybutyrylcarnitine (1)	0.773307	0.115451	0.86402
dihomo-linolenate (20:3n3 or n6)	0.522154	0.116799	0.86402
cis-4-decenoylcarnitine (C10:1)	-0.415289	0.117756	0.86402
cyclo(phe-pro)	0.722382	0.12745	0.916288
X - 11880	1.1083	0.129328	0.916288
guanosine	0.711112	0.130478	0.916288
X - 13835	0.29473	0.131316	0.916288
valerylcarnitine (C5)	0.61482	0.132403	0.916288
X - 21891	-0.512972	0.134602	0.921042
cytidine	-0.305801	0.137575	0.930926
butyrylcarnitine (C4)	0.866677	0.140147	0.933465
X - 12216	-0.623961	0.143157	0.933465
fructose 1,6-bisphosphate	0.400627	0.143554	0.933465
docosahexaenoate (DHA; 22:6n3)	0.576855	0.146594	0.933465
glutarylcarnitine (C5-DC)	-0.538885	0.148994	0.933465
Fibrinopeptide B (1-12)**	0.853377	0.149399	0.933465
1-arachidonoyl-GPI (20:4)*	-0.236906	0.149712	0.933465
X - 15375	-0.247468	0.150213	0.933465
dodecenedioate (C12:1-DC)*	-0.37642	0.154139	0.942348
X - 12544	1.0898	0.155544	0.942348
isobutyrylcarnitine (C4)	0.791872	0.158337	0.942348
2-oleoylglycerol (18:1)	-0.38126	0.159345	0.942348
prolylglycine	0.228166	0.159379	0.942348
4-allylphenol sulfate	0.846185	0.162844	0.953576
alpha-hydroxyisovalerate	0.410424	0.166619	0.957906
acetylcarnitine (C2)	0.446719	0.167437	0.957906
X - 24952	0.417803	0.168302	0.957906
trans-nonadecenoate (tr 19:1)*	-0.236113	0.173264	0.977015
X - 24369	0.589236	0.179031	0.979985
10-heptadecenoate (17:1n7)	-0.106491	0.18695	0.979985
X - 24309	0.751105	0.190477	0.979985
3-hydroxy-2-ethylpropionate	0.432818	0.190752	0.979985
5-methyluridine (ribothymidine)	0.165388	0.192324	0.979985
dehydroascorbate	-0.659369	0.192648	0.979985
beta-hydroxyisovalerate	0.665971	0.195657	0.979985
phosphoethanolamine	-0.209927	0.19881	0.979985
2-methylmalonylcarnitine (C4-DC)	-0.331346	0.19925	0.979985
X - 22154	-0.357507	0.199287	0.979985
X - 14318	-0.286645	0.199795	0.979985
myo-inositol	-0.374309	0.203086	0.979985
2-arachidonoylglycerol (20:4)	-0.778684	0.203689	0.979985
X - 22590	-0.415663	0.204998	0.979985
1-oleoyl-GPI (18:1)*	0.376684	0.209313	0.979985
X - 14904	0.804897	0.209868	0.979985
hydroxy-CMPF*	0.742216	0.210701	0.979985
X - 14352	-0.239737	0.210702	0.979985
eicosapentaenoate (EPA; 20:5n3)	0.377865	0.212901	0.979985
thymol sulfate	-0.930907	0.213936	0.979985
2-hydroxystearate	-0.231356	0.214076	0.979985
methyl-4-hydroxybenzoate	-0.473828	0.214489	0.979985
X - 13007	0.864786	0.220456	0.979985
dodecadienoate (12:2)*	-0.139124	0.220999	0.979985
phenylalanylglycine	0.194039	0.223423	0.979985
palmitoleate (16:1n7)	-0.189922	0.224917	0.979985
taurocyamine	-0.399432	0.225442	0.979985
hexanoylcarnitine (C6)	0.614768	0.227993	0.979985
N2-acetyllysine	-0.83177	0.230417	0.979985
pantothenate	-0.169968	0.234535	0.979985
N-methylpipecolate	-0.250867	0.235811	0.979985
2-hydroxypalmitate	-0.303137	0.240392	0.979985
X - 13658	-0.21196	0.241693	0.979985
2-hydroxyoleate	-0.446197	0.242381	0.979985
alpha-hydroxycaproate	-0.150404	0.243638	0.979985
choline phosphate	-0.252886	0.24453	0.979985
androsterone glucuronide	0.841576	0.244871	0.979985
acetylphosphate	0.365766	0.247789	0.979985
N-stearoyltaurine	-0.476772	0.250885	0.979985
N-palmitoyltaurine	-0.388276	0.25163	0.979985
X - 22517	-0.161058	0.254468	0.979985
ophthalmate	-0.349488	0.254612	0.979985
cyclo(gly-pro)	1.06632	0.254893	0.979985
adrenate (22:4n6)	0.754026	0.257085	0.979985
2-hydroxyheptanoate*	-0.180797	0.257919	0.979985
dihomo-linoleate (20:2n6)	0.108062	0.257951	0.979985
beta-hydroxyisovaleroylcarnitine	0.238299	0.259141	0.979985
O-sulfo-L-tyrosine	-0.319932	0.262429	0.979985
androstenediol (3beta,17beta) monosulfate (1)	0.447225	0.26349	0.979985
glycylleucine	0.251235	0.26809	0.979985
glycerol 3-phosphate	-0.557925	0.272154	0.979985
hypotaurine	-0.360222	0.273751	0.979985
docosapentaenoate (n3 DPA; 22:5n3)	0.406317	0.277179	0.979985
alpha-glutamylleucine*	-0.227793	0.278885	0.979985
13-HODE + 9-HODE	0.512643	0.279471	0.979985
6-hydroxyindole sulfate	-0.354918	0.279897	0.979985
X - 15168	0.295368	0.282723	0.979985
gamma-glutamylglutamate	-1.06701	0.284191	0.979985
X - 22518	0.544168	0.284226	0.979985
1-arachidonylglycerol (20:4)	-0.808224	0.286122	0.979985
N-acetylthreonine	0.138534	0.286159	0.979985
cytidine 5'-diphosphocholine	-0.54358	0.288164	0.979985
gamma-glutamylphenylalanine	-0.525377	0.291057	0.979985
X - 11381	-0.199384	0.291472	0.979985
adenosine 3',5'-diphosphate	-0.268094	0.292245	0.979985
X - 22775	-0.463715	0.295371	0.979985
salicylate	-0.577505	0.296175	0.979985
threonine	0.128064	0.297275	0.979985
tryptophan betaine	-0.563763	0.298614	0.979985
3-indoxyl sulfate	-0.300773	0.299728	0.979985
X - 12206	-0.358785	0.30163	0.979985
adenosine 5'-monophosphate (AMP)	-0.517147	0.302518	0.979985
docosapentaenoate (n6 DPA; 22:5n6)	0.440123	0.303945	0.979985
linolenate [alpha or gamma; (18:3n3 or 6)]	-0.114256	0.306676	0.979985
acetyl CoA	0.591307	0.309826	0.979985
mead acid (20:3n9)	0.339878	0.312509	0.979985
hexadecanedioate (C16-DC)	-0.20486	0.313345	0.979985
3-carboxy-4-methyl-5-propyl-2-furanpropanoate (CMPF)	0.756095	0.316735	0.979985
X - 16576	-0.553278	0.316769	0.979985
beta-citrylglutamate	0.233903	0.318618	0.979985
docosadienoate (22:2n6)	0.309235	0.318655	0.979985
cytidine 5'-monophosphate (5'-CMP)	-0.36251	0.322	0.979985
3,4-methyleneheptanoylcarnitine	0.291871	0.322907	0.979985
X - 18921	0.308979	0.323741	0.979985
S-lactoylglutathione	-0.711295	0.323767	0.979985
Fibrinopeptide B (1-9)**	-1.00568	0.326814	0.979985
uridine 5'-monophosphate (UMP)	-0.670065	0.327738	0.979985
Fibrinopeptide A (5-16)*	-1.13537	0.328067	0.979985
N-acetylhistidine	-0.602487	0.333652	0.979985
(14 or 15)-methylpalmitate (a17:0 or i17:0)	-0.0962428	0.333697	0.979985
3-hydroxyoleate*	-0.347883	0.333994	0.979985
linoleoyl ethanolamide	0.465898	0.334132	0.979985
UDP-glucuronate	0.627266	0.340747	0.979985
X - 16129	-1.20431	0.341933	0.979985
creatine	-0.0915248	0.343492	0.979985
X - 13871	0.624808	0.34356	0.979985
indolepropionate	-0.40942	0.344192	0.979985
isovalerylcarnitine (C5)	0.486639	0.345311	0.979985
X - 11372	0.463266	0.345615	0.979985
palmitoyl ethanolamide	0.260071	0.347638	0.979985
X - 22155	-0.480339	0.34768	0.979985
X - 16932	-1.59582	0.35171	0.979985
Fibrinopeptide B (1-11)**	-0.95488	0.351896	0.979985
stearate (18:0)	0.121299	0.354895	0.979985
X - 15562	-1.00831	0.360749	0.979985
lidocaine	0.912381	0.362183	0.979985
2-hydroxy-3-methylvalerate	0.279385	0.362384	0.979985
1-linoleoyl-GPG (18:2)*	0.304133	0.365888	0.979985
1-methylhistidine	0.126254	0.36722	0.979985
X - 12007	-0.423196	0.368319	0.979985
C-glycosyltryptophan	-0.189013	0.371214	0.979985
X - 11407	-0.356645	0.371855	0.979985
paraxanthine	-0.670865	0.373299	0.979985
X - 15664	0.435711	0.373942	0.979985
N6-carbamoylthreonyladenosine	-0.251556	0.373955	0.979985
X - 22772	-0.158303	0.379827	0.979985
X - 12234	-0.352995	0.383182	0.979985
homoarginine	-0.194749	0.385008	0.979985
creatine phosphate	-1.09834	0.385321	0.979985
N2,N2-dimethylguanosine	-0.244898	0.385502	0.979985
adenine	0.295532	0.386721	0.979985
N-ethylglycinexylidide	0.741235	0.393479	0.979985
10-nonadecenoate (19:1n9)	-0.0814691	0.393829	0.979985
X - 12056	0.615553	0.395411	0.979985
2-hydroxyoctanoate	-0.120321	0.39571	0.979985
phenyllactate (PLA)	0.17947	0.395806	0.979985
malonylcarnitine	-0.252629	0.396752	0.979985
saccharopine	-0.477505	0.397663	0.979985
X - 11850	2.25142	0.397769	0.979985
citrulline	0.173057	0.397993	0.979985
3-formylindole	0.262317	0.399553	0.979985
histidine	-0.151918	0.40027	0.979985
taurolithocholate 3-sulfate	0.543778	0.40184	0.979985
dehydroisoandrosterone sulfate (DHEA-S)	0.322356	0.402878	0.979985
arachidonate (20:4n6)	0.377648	0.403829	0.979985
kynurenine	-0.234653	0.404282	0.979985
glycerophosphoinositol*	0.768557	0.404839	0.979985
3-methylglutarylcarnitine (2)	-0.576452	0.405548	0.979985
2-stearoyl-GPE (18:0)*	-0.208611	0.405712	0.979985
X - 23314	0.23351	0.406287	0.979985
Fibrinopeptide A, des-ala(1)*	-1.00792	0.407797	0.979985
1-methylxanthine	-0.563188	0.408204	0.979985
X - 17138	-0.342458	0.408716	0.979985
X - 21342	-0.233097	0.408742	0.979985
adenosine 2'-monophosphate (2'-AMP)	0.720038	0.408957	0.979985
tiglylcarnitine (C5:1-DC)	0.414508	0.409098	0.979985
oleoyl CoA	-0.0991677	0.410338	0.979985
leucylalanine	-0.479443	0.415162	0.987631
spermine	0.827577	0.420681	0.994022
valylleucine	0.231344	0.426999	0.994022
X - 21319	0.172223	0.428417	0.994022
X - 22776	0.196575	0.428525	0.994022
inosine	0.280383	0.429532	0.994022
7-methylguanine	-0.250531	0.430137	0.994022
urate	0.229315	0.431222	0.994022
heme	0.27662	0.432143	0.994022
N6-succinyladenosine	0.380679	0.432728	0.994022
X - 11444	0.220334	0.435774	0.994022
N-acetylarginine	-0.271899	0.436116	0.994022
nonadecanoate (19:0)	0.121178	0.438864	0.994022
pyruvate	0.270581	0.440032	0.994022
X - 17185	-0.598687	0.440699	0.994022
3-methyl catechol sulfate (1)	-0.548709	0.443914	0.995176
oxalate (ethanedioate)	0.128881	0.446073	0.995176
X - 12115	-0.20815	0.446918	0.995176
X - 12329	0.785535	0.449191	0.995176
palmitate (16:0)	0.0372011	0.449958	0.995176
pyroglutamylisoleucine*	-0.39422	0.456313	0.995176
glycolithocholate sulfate*	-0.315152	0.458322	0.995176
oleamide	-1.09162	0.461315	0.995176
X - 11580	0.210224	0.465087	0.995176
erucate (22:1n9)	0.231867	0.465096	0.995176
X - 15563	-0.393148	0.466201	0.995176
caprylate (8:0)	0.161105	0.466464	0.995176
perfluorooctanesulfonate (PFOS)	0.678057	0.468936	0.995176
gamma-glutamylleucine	-0.257895	0.470902	0.995176
X - 21431	0.551481	0.472477	0.995176
valylglutamine	-0.172001	0.47329	0.995176
adenosine 5'-diphosphoribose (ADP-ribose)	-0.320949	0.474116	0.995176
N-acetylglycine	-0.0826353	0.475889	0.995176
choline	0.143285	0.480414	0.995176
gamma-glutamylglutamine	-0.516307	0.481095	0.995176
1-palmitoyl-GPA (16:0)	-0.288558	0.481846	0.995176
X - 11470	0.44459	0.482131	0.995176
1-linoleoylglycerol (18:2)	0.196559	0.483119	0.995176
1-(1-enyl-palmitoyl)-GPC (P-16:0)*	0.4022	0.485508	0.995176
nicotinamide	-0.0889632	0.486919	0.995176
androsterone sulfate	0.37264	0.49358	0.995176
X - 21769	0.231143	0.493767	0.995176
X - 15166	0.204145	0.49737	0.995176
Isobar: glucose, fructose, mannose, galactose, etc.	0.166388	0.498565	0.995176
5alpha-androstan-3beta,17beta-diol disulfate	0.311041	0.498862	0.995176
S-adenosylmethionine (SAM)	0.218971	0.498916	0.995176
2-methylbutyrylcarnitine (C5)	0.236894	0.502841	0.995176
docosatrienoate (22:3n3)	-0.183199	0.502983	0.995176
phenol sulfate	-0.373198	0.503346	0.995176
X - 12015	-0.146189	0.505297	0.995176
decanoylcarnitine (C10)	-0.290798	0.505387	0.995176
X - 11805	-0.798383	0.510925	0.995176
X - 11795	-0.212114	0.511748	0.995176
nicotinamide adenine dinucleotide (NAD+)	-0.495324	0.512161	0.995176
phenylacetylglutamate	-0.23692	0.51316	0.995176
1-(1-enyl-stearoyl)-GPE (P-18:0)*	0.2216	0.517942	0.995176
guanine	0.242809	0.523561	0.995176
X - 23369	0.155676	0.527834	0.995176
3-hydroxyoctanoate	-0.119765	0.528197	0.995176
adenosine 3',5'-cyclic monophosphate (cAMP)	-0.157416	0.529815	0.995176
deoxycarnitine	-0.0589607	0.531704	0.995176
1-methylurate	-0.406772	0.533422	0.995176
cysteine-glutathione disulfide	-0.223882	0.539331	0.995176
N-acetyltryptophan	-0.392849	0.542802	0.995176
3-methylxanthine	-0.43807	0.544597	0.995176
N-methylproline	0.469402	0.545257	0.995176
3-methyl-2-oxobutyrate	-0.214063	0.545401	0.995176
androstenediol (3beta,17beta) disulfate (1)	0.151017	0.546037	0.995176
benzoylcarnitine*	-0.0930574	0.547142	0.995176
deoxycholate	0.238498	0.552786	0.995176
N-oleoyltaurine	-0.198495	0.553471	0.995176
linoleamide (18:2n6)	-0.638978	0.556378	0.995176
X - 11315	-0.165409	0.558589	0.995176
maltopentaose	0.513061	0.563776	0.995176
adenosine 5'-diphosphate (ADP)	0.314519	0.564983	0.995176
X - 16124	-1.10794	0.565027	0.995176
glycerate	-0.133578	0.566312	0.995176
4-acetamidobutanoate	-0.179029	0.570578	0.995176
2-aminoheptanoate	-0.156412	0.570852	0.995176
isobutyrylglycine	0.135374	0.572453	0.995176
maltitol/lactitol/cellobiotol/palatinol	-0.116253	0.574272	0.995176
spermidine	0.184813	0.577574	0.995176
4-methylbenzenesulfonate	-0.669445	0.579393	0.995176
1-stearoyl-GPG (18:0)	0.287832	0.579818	0.995176
taurochenodeoxycholate	0.417679	0.580543	0.995176
pipecolate	-0.187204	0.586733	0.995176
1-palmitoyl-GPE (16:0)	0.537723	0.587183	0.995176
2-aminooctanoate	-0.163069	0.587353	0.995176
alpha-glutamylisoleucine*	-0.148401	0.589927	0.995176
X - 14056	0.403807	0.590971	0.995176
3-hydroxystearate	0.0654061	0.59178	0.995176
1-stearoyl-GPI (18:0)	0.0829273	0.593133	0.995176
acisoga	-0.153312	0.59341	0.995176
3-methoxytyrosine	-0.141666	0.597491	0.995176
glutamine	-0.132752	0.600277	0.995176
riboflavin (Vitamin B2)	0.22464	0.603762	0.995176
X - 22767	-0.504509	0.60531	0.995176
taurodeoxycholate	0.356065	0.607177	0.995176
X - 10457	-0.141728	0.61067	0.995176
valerate (5:0)	-0.104396	0.615852	0.995176
carnosine	0.0696918	0.61793	0.995176
maltotetraose	-0.355357	0.618383	0.995176
guaiacol sulfate	0.232339	0.620151	0.995176
N-acetylphenylalanine	-0.187882	0.62295	0.995176
N,N,N-trimethyl-5-aminovalerate	0.0998371	0.623956	0.995176
X - 11261	0.1371	0.62633	0.995176
flavin adenine dinucleotide (FAD)	-0.0890481	0.626985	0.995176
1-linoleoyl-GPC (18:2)	-0.120879	0.628106	0.995176
X - 22806	0.167968	0.628667	0.995176
X - 12100	-0.165964	0.629525	0.995176
1-stearoyl-GPE (18:0)	-0.104197	0.630153	0.995176
epiandrosterone sulfate	0.246899	0.632772	0.995176
gamma-glutamylisoleucine*	-0.178573	0.633269	0.995176
X - 21453	0.172488	0.633654	0.995176
ergothioneine	0.300965	0.640488	0.995176
indoleacetate	-0.116635	0.641582	0.995176
4-hydroxybenzoate	0.225954	0.641872	0.995176
threonylphenylalanine	-0.276896	0.642089	0.995176
X - 21258	-0.545089	0.642831	0.995176
X - 10445	-0.0940192	0.644849	0.995176
X - 21729	0.159514	0.644941	0.995176
N1-methyladenosine	0.051667	0.648487	0.995176
isovalerate (i5:0)	-0.0890693	0.648765	0.995176
gamma-glutamylalanine	-0.460338	0.648908	0.995176
3-phosphoglycerate	-0.545397	0.650687	0.995176
maltotriose	-0.371052	0.650769	0.995176
2-palmitoyl-GPC (16:0)*	-0.142877	0.651545	0.995176
S-nitrosoglutathione (GSNO)	0.308727	0.651977	0.995176
X - 12425	0.210728	0.65295	0.995176
valylglycine	0.0734237	0.657735	0.995176
7-alpha-hydroxy-3-oxo-4-cholestenoate (7-Hoca)	0.153807	0.659753	0.995176
N-acetyltyrosine	-0.168996	0.662976	0.995176
o-cresol sulfate	0.267128	0.664843	0.995176
linoleoylcarnitine (C18:2)*	0.3552	0.665324	0.995176
X - 23537	0.144862	0.665534	0.995176
X - 14193	0.170044	0.668896	0.995176
myristoylcarnitine (C14)	0.400602	0.671065	0.995176
pyridoxate	-0.112648	0.673054	0.995176
1-oleoyl-GPC (18:1)	-0.172551	0.675831	0.995176
1,3-dimethylurate	-0.140024	0.677465	0.995176
theophylline	-0.23896	0.678572	0.995176
dihydroxyacetone phosphate (DHAP)	-0.0920953	0.681683	0.995176
X - 11440	0.12176	0.681771	0.995176
palmitamide (16:0)	-0.244166	0.68457	0.995176
phosphopantetheine	0.206269	0.688064	0.995176
(16 or 17)-methylstearate (a19:0 or i19:0)	0.0516407	0.688645	0.995176
Fibrinopeptide B (1-13)**	0.32272	0.689479	0.995176
1-oleoylglycerol (18:1)	0.134687	0.689648	0.995176
indolelactate	-0.115123	0.691207	0.995176
N-(2-furoyl)glycine	-0.35463	0.692898	0.995176
X - 24375	-0.113701	0.694	0.995176
anserine	0.080024	0.694227	0.995176
linoleate (18:2n6)	0.0874713	0.694378	0.995176
hexadecadienoate (16:2n6)	0.0933955	0.694456	0.995176
X - 13553	0.0722935	0.69564	0.995176
glycocholate	-0.196566	0.696655	0.995176
stachydrine	0.223966	0.699628	0.995176
glutathione, reduced (GSH)	-0.117781	0.705191	0.995176
N4-acetylcytidine	-0.0924112	0.707907	0.995176
X - 12680	0.027535	0.711291	0.995176
3-hydroxybutyrate (BHBA)	0.15489	0.711985	0.995176
methionine sulfone	-0.125943	0.714103	0.995176
X - 24813	0.0764403	0.715937	0.995176
androstenediol (3beta,17beta) monosulfate (2)	0.144859	0.717555	0.995176
S-methylcysteine	-0.0863611	0.718275	0.995176
X - 23196	0.106572	0.719862	0.995176
tetradecadienoate (14:2)*	-0.128924	0.720237	0.995176
X - 21796	-0.0613825	0.721349	0.995176
X - 15161	0.106167	0.725702	0.995176
X - 12104	0.128349	0.725759	0.995176
4-guanidinobutanoate	-0.108797	0.729982	0.995176
4-methyl-2-oxopentanoate	0.080024	0.731776	0.995176
flavin mononucleotide (FMN)	0.140573	0.732983	0.995176
glycochenodeoxycholate 3-sulfate	-0.354162	0.733106	0.995176
hippurate	-0.167186	0.734327	0.995176
X - 21607	-0.143805	0.734731	0.995176
pro-hydroxy-pro	-0.164895	0.735685	0.995176
X - 21477	0.118735	0.735993	0.995176
betaine	0.0781423	0.738504	0.995176
uracil	-0.2033	0.741172	0.995176
2-palmitoleoyl-GPC (16:1)*	0.186073	0.741492	0.995176
glycylvaline	-0.212862	0.741734	0.995176
1-stearoyl-GPS (18:0)*	0.0574812	0.741773	0.995176
pregnenediol disulfate (C21H34O8S2)*	0.109445	0.743595	0.995176
theobromine	-0.262562	0.74432	0.995176
palmitoylcarnitine (C16)	0.101191	0.747185	0.995176
succinylcarnitine (C4-DC)	-0.0850199	0.748702	0.995176
cortisol	0.216179	0.751093	0.995176
X - 15220	0.0621061	0.751383	0.995176
1-(1-enyl-palmitoyl)-GPE (P-16:0)*	0.12368	0.75216	0.995176
cyclo(phe-pro) (L,D)*	0.273345	0.752779	0.995176
proline	0.0657193	0.758303	0.995176
sphingosine	0.145741	0.758454	0.995176
X - 18938	-0.13604	0.758831	0.995176
uridine 5'-diphosphate (UDP)	0.182793	0.758848	0.995176
2-aminophenol sulfate	-0.159492	0.759233	0.995176
4-ethylphenylsulfate	-0.270329	0.76426	0.995176
isovalerylglycine	0.0738936	0.767079	0.995176
phosphoenolpyruvate (PEP)	0.327054	0.767772	0.995176
X - 18779	0.192374	0.768942	0.995176
stearoylcarnitine (C18)	-0.0778034	0.773775	0.995176
X - 12097	0.151884	0.775095	0.995176
aspartate	-0.138087	0.775517	0.995176
alanine	-0.0466814	0.777569	0.995176
X - 24947	-0.155198	0.777749	0.995176
glutathione, oxidized (GSSG)	-0.0770105	0.778123	0.995176
N6-acetyllysine	-0.150051	0.779102	0.995176
methyl-4-hydroxybenzoate sulfate	-0.344511	0.779806	0.995176
1-arachidonoyl-GPE (20:4n6)*	-0.0301597	0.786236	0.995176
1,7-dimethylurate	-0.139546	0.786518	0.995176
imidazole lactate	-0.129906	0.78662	0.995176
1-palmitoyl-GPC (16:0)	0.210295	0.788441	0.995176
N-acetylmethionine	0.0326659	0.788499	0.995176
catechol sulfate	0.140522	0.790055	0.995176
pyridoxal phosphate	0.129622	0.790529	0.995176
octanoylcarnitine (C8)	0.0955894	0.790786	0.995176
dopamine 3-O-sulfate	-0.0907627	0.791177	0.995176
serine	-0.0998362	0.793448	0.995176
X - 24972	-0.134689	0.794039	0.995176
pyroglutamylleucine*	0.157025	0.795382	0.995176
valerylglycine	0.0610463	0.7992	0.995176
cis-4-decenoate (10:1n6)*	-0.04462	0.802715	0.995176
1-oleoyl-GPE (18:1)	-0.041167	0.802857	0.995176
creatinine	0.0460686	0.803051	0.995176
HWESASXX*	-0.375122	0.804462	0.995176
1-myristoylglycerol (14:0)	-0.0689936	0.804968	0.995176
X - 11787	-0.0607537	0.807839	0.995176
4-vinylphenol sulfate	-0.179409	0.808599	0.995176
glycodeoxycholate 3-sulfate	-0.163299	0.813129	0.995176
laurylcarnitine (C12)	0.136742	0.817477	0.995176
pseudouridine	-0.0194119	0.818554	0.995176
X - 21353	-0.0501319	0.818885	0.995176
taurine	-0.0640716	0.819819	0.995176
isoleucine	-0.0459414	0.821532	0.995176
piperine	0.209485	0.823326	0.995176
X - 17654	-0.116641	0.82374	0.995176
pyroglutamine*	0.0517123	0.824097	0.995176
X - 22415	-0.175311	0.824199	0.995176
N-acetylisoleucine	0.115121	0.824581	0.995176
S-methylglutathione	-0.0292224	0.826182	0.995176
N-acetylleucine	-0.0915619	0.826476	0.995176
myristoleoylcarnitine (C14:1)*	0.170015	0.826729	0.995176
glycochenodeoxycholate	0.11286	0.829856	0.995176
7-methylxanthine	-0.143898	0.829992	0.995176
X - 21785	0.0375026	0.835772	0.995176
X - 11478	0.0462969	0.837361	0.995176
1-stearoyl-GPC (18:0)	-0.0596424	0.837593	0.995176
leucylglycine	-0.0778615	0.838997	0.995176
N-acetyl-aspartyl-glutamate (NAAG)	0.044478	0.839163	0.995176
1-arachidonoyl-GPC (20:4n6)*	0.0643521	0.841496	0.995176
adenosine	0.118712	0.843696	0.995176
3-methyl-2-oxovalerate	0.0454064	0.844468	0.995176
p-cresol sulfate	0.0836981	0.847987	0.995176
lactate	-0.0460916	0.849372	0.995176
X - 22519	0.0737784	0.850844	0.995176
glycylisoleucine	0.0349352	0.851131	0.995176
X - 12407	-0.121973	0.854388	0.995176
Fibrinopeptide A*	0.181329	0.855939	0.995176
X - 17269	-0.0407366	0.856344	0.995176
caproate (6:0)	-0.0310164	0.858631	0.995176
pelargonate (9:0)	0.0192401	0.859724	0.995176
bradykinin, des-arg(9)	-0.264949	0.860338	0.995176
ribose/ribulose/xylulose/arabinose 5-phosphate	0.0270641	0.864806	0.995176
7-hydroxycholesterol (alpha or beta)	0.133956	0.865304	0.995176
3-hydroxyhexanoate	-0.0307314	0.865557	0.995176
glycocholenate sulfate*	0.0494095	0.866622	0.995176
caffeine	0.124468	0.867194	0.995176
biliverdin	0.0567135	0.869931	0.995176
N-acetylvaline	0.0587493	0.870477	0.995176
arachidate (20:0)	0.0213376	0.870847	0.995176
X - 17010	0.0435314	0.87094	0.995176
X - 21410	0.0584068	0.871284	0.995176
3-hydroxyhexanoylcarnitine (1)	0.0417787	0.87196	0.995176
nicotinate	0.0330968	0.872515	0.995176
X - 21457	-0.0548937	0.872793	0.995176
6-oxopiperidine-2-carboxylate	0.0544267	0.872828	0.995176
1-(1-enyl-oleoyl)-GPE (P-18:1)*	0.0617273	0.875273	0.995176
phosphate	-0.0280907	0.875631	0.995176
X - 22507	0.0816747	0.883618	0.995176
X - 23240	-0.0323829	0.884787	0.995176
quinate	-0.0828008	0.884917	0.995176
X - 13743	0.0524193	0.885233	0.995176
alpha-hydroxyisocaproate	0.0199691	0.889366	0.995176
succinate	0.0674197	0.891356	0.995176
eicosenoate (20:1)	-0.0227924	0.894797	0.995176
margarate (17:0)	-0.0114094	0.899168	0.995176
tyrosine	0.0298325	0.901314	0.995176
argininosuccinate	-0.0331377	0.905121	0.995176
1-linoleoyl-GPI (18:2)*	0.021538	0.905813	0.995176
glutaminylleucine	0.0436743	0.90622	0.995176
glutamate, gamma-methyl ester	-0.0854942	0.907556	0.995176
3-hydroxyhippurate	-0.0951311	0.91026	0.995176
asparagine	-0.0460599	0.911344	0.995176
trigonelline (N'-methylnicotinate)	-0.0505872	0.912689	0.995176
gamma-glutamylvaline	0.139189	0.914476	0.995176
glycodeoxycholate	-0.0699495	0.915384	0.995176
phenylacetylglutamine	-0.0379935	0.916733	0.995176
tyrosylglycine	-0.0131483	0.916817	0.995176
X - 17299	-0.0144946	0.917502	0.995176
phenylalanine	0.0242289	0.919488	0.995176
X - 16394	0.0208282	0.920264	0.995176
3-carboxy-4-methyl-5-pentyl-2-furanpropionate (3-CMPFP)**	0.0297883	0.921147	0.995176
N1-methylguanosine	0.0219168	0.921269	0.995176
oleoylcarnitine (C18:1)	-0.0266955	0.921747	0.995176
taurocholate	0.122908	0.923457	0.995176
isoleucylglycine	0.0251756	0.924712	0.995176
X - 15382	-0.0178141	0.924714	0.995176
1,5-anhydroglucitol (1,5-AG)	0.0132981	0.924899	0.995176
caprate (10:0)	0.0200041	0.925001	0.995176
4-hydroxy-nonenal-glutathione	-0.0288754	0.92547	0.995176
3-hydroxypyridine sulfate	-0.0783047	0.927065	0.995176
androstenediol (3beta,17beta) disulfate (2)	-0.0216123	0.929059	0.995176
hexadecatrienoate (16:3n3)	0.031254	0.929273	0.995176
N-acetylcarnosine	-0.0190527	0.929812	0.995176
N-acetyltaurine	-0.0254048	0.931974	0.995741
X - 12798	0.012555	0.939786	0.999273
X - 15484	0.0141895	0.948047	0.999273
3-phenylpropionate (hydrocinnamate)	-0.0263166	0.951797	0.999273
alpha-hydroxyisovaleroyl carnitine*	-0.0147624	0.953041	0.999273
N-acetylglutamine	0.0319827	0.955971	0.999273
trans-4-hydroxyproline	0.0145429	0.95824	0.999273
alanylleucine	-0.00954764	0.961184	0.999273
butyrylglycine	-0.0202266	0.962359	0.999273
X - 12953	0.0551004	0.962583	0.999273
1,2,3-benzenetriol sulfate (2)	0.0581444	0.963381	0.999273
erucamide	-0.0391166	0.96431	0.999273
glycerophosphoethanolamine	-0.00976645	0.964671	0.999273
histamine	0.00536315	0.969208	0.999273
gamma-glutamyltyrosine	-0.0232661	0.9703	0.999273
Fibrinopeptide A, phosphono-ser(3)*	0.024058	0.972393	0.999273
X - 24748	0.0049701	0.972857	0.999273
tryptophan	0.0114976	0.974125	0.999273
5-oxoproline	-0.00889595	0.97433	0.999273
N-acetylserine	0.0117102	0.974448	0.999273
leucine	-0.0050475	0.976733	0.999273
epsilon-caprolactam	-0.0050702	0.977435	0.999273
X - 15678	0.0157689	0.977887	0.999273
1-palmitoleoyl-GPC (16:1)*	0.018506	0.980262	0.999273
5-methylthioadenosine (MTA)	-0.008763	0.980568	0.999273
pregnenediol sulfate (C21H34O5S)*	0.0107733	0.982018	0.999273
phenylalanylalanine	-0.00360091	0.982447	0.999273
homocitrulline	-0.00458247	0.985721	0.999273
taurocholenate sulfate*	-0.00685662	0.985791	0.999273
valine	-0.00299028	0.986791	0.999273
(12 or 13)-methylmyristate (a15:0 or i15:0)	-0.00240601	0.988985	0.999273
X - 12096	-0.00711617	0.989027	0.999273
kynurenate	-0.00473937	0.989896	0.999273
N-formylphenylalanine	0.00201481	0.992554	0.999273
5,6-dihydrouridine	0.00177536	0.994645	0.999273
X - 21628	-0.00573121	0.994781	0.999273
N-acetylalanine	0.00238788	0.995461	0.999273
2-stearoyl-GPC (18:0)*	-0.00382247	0.996572	0.999273
N-methylhydroxyproline**	0.00374904	0.997632	0.999273
N1-Methyl-4-pyridone-3-carboxamide	-7.3033e-06	0.999984	0.999984

## Sheet: Table S4
Supplementary Table S4: Response to chronic training; results from paired t-test, comparing metabolite levels (log2-transformed) at 45 min after the last bout of resistance exercise after a 5-week RE training to levels at 45 min after the first (unaccustomed) bout of resistance exercise; bold letters indicate significance after multiple testing correction (FDR<0.33); italic letters indicate chang…
Metabolite name	log2 fold change	p-value	q-value
N-acetylvaline	-0.429949	0.000349583	0.186161
1-stearoyl-GPE (18:0)	-0.47552	0.0012108	0.27515
N-acetylleucine	-0.431789	0.00220903	0.27515
xanthosine	-1.01703	0.00242536	0.27515
3-hydroxybutyrate (BHBA)	-0.568017	0.00288888	0.27515
acetylphosphate	-1.31467	0.00353314	0.27515
fructose 1,6-bisphosphate	-1.11203	0.00361683	0.27515
sulfate*	-0.495848	0.00596857	0.323606
beta-citrylglutamate	0.770849	0.00639362	0.323606
N-acetylphenylalanine	-0.443919	0.00654114	0.323606
N1-Methyl-2-pyridone-5-carboxamide	-0.602583	0.00668453	0.323606
1-(1-enyl-stearoyl)-GPE (P-18:0)*	-0.817383	0.00765922	0.339893
uridine 5'-diphosphate (UDP)	-1.56199	0.00882148	0.361357
1-(1-enyl-palmitoyl)-GPE (P-16:0)*	-0.639624	0.00994436	0.378257
glycerophosphorylcholine (GPC)	-0.762661	0.01375	0.488146
5,6-dihydrouridine	1.2922	0.0148641	0.494716
X - 15382	0.544313	0.0160949	0.496451
N-formylphenylalanine	-0.412124	0.0167807	0.496451
X - 15484	0.495162	0.018578	0.507056
hexadecadienoate (16:2n6)	-0.500745	0.0195366	0.507056
imidazole propionate	-0.477352	0.0201241	0.507056
benzoylcarnitine*	-0.550219	0.0224593	0.507056
1-(1-enyl-oleoyl)-GPE (P-18:1)*	-0.708287	0.0233358	0.507056
1-(1-enyl-palmitoyl)-GPC (P-16:0)*	-1.07737	0.0236113	0.507056
maltitol/lactitol/cellobiotol/palatinol	-0.294051	0.0249354	0.507056
valerylcarnitine (C5)	-1.10451	0.0257449	0.507056
erucate (22:1n9)	-0.542316	0.0284602	0.507056
X - 23314	-0.976209	0.0285376	0.507056
guanosine 5'- monophosphate (5'-GMP)	0.411763	0.0293002	0.507056
beta-hydroxyisovaleroylcarnitine	-0.551878	0.0296183	0.507056
(14 or 15)-methylpalmitate (a17:0 or i17:0)	-0.152881	0.0299869	0.507056
3-hydroxy-2-ethylpropionate	-0.852042	0.0304696	0.507056
docosahexaenoate (DHA; 22:6n3)	-0.980654	0.0327404	0.513185
X - 12015	-0.772929	0.0327653	0.513185
adenine	-0.552323	0.0357879	0.542978
X - 21410	-0.837244	0.0367067	0.542978
prolylglycine	-0.675842	0.0407409	0.562292
N-acetylcarnosine	-0.362924	0.0439391	0.562292
isobutyrylglycine	-0.284764	0.0444103	0.562292
flavin mononucleotide (FMN)	-0.726674	0.0446295	0.562292
1-methylhistidine	-0.513191	0.0452394	0.562292
lidocaine	-2.67056	0.0459625	0.562292
X - 12407	-1.49569	0.0485942	0.562292
X - 23369	-0.572847	0.0491821	0.562292
N-ethylglycinexylidide	-2.50754	0.0495009	0.562292
eicosapentaenoate (EPA; 20:5n3)	-0.585843	0.0499235	0.562292
linoleate (18:2n6)	-0.61603	0.0516602	0.562292
taurochenodeoxycholate	-0.958032	0.0523851	0.562292
1-linoleoyl-GPG (18:2)*	-0.7556	0.0546002	0.562292
X - 12056	-1.75945	0.056081	0.562292
cytidine	-0.699122	0.0569623	0.562292
phenyllactate (PLA)	-0.185038	0.0572447	0.562292
X - 12680	-0.489621	0.0573794	0.562292
10-heptadecenoate (17:1n7)	-0.320057	0.0589084	0.562292
3-phenylpropionate (hydrocinnamate)	-0.607446	0.0589938	0.562292
N-acetyltyrosine	-0.281001	0.0591305	0.562292
X - 18779	-0.735954	0.0624899	0.57244
cytidine 5'-monophospho-N-acetylneuraminic acid	0.669498	0.064876	0.57244
riboflavin (Vitamin B2)	-0.603442	0.0657176	0.57244
X - 21785	-0.283603	0.0663016	0.57244
cyclo(phe-pro)	-0.944289	0.0690578	0.57244
N-acetyl-aspartyl-glutamate (NAAG)	-0.654075	0.069643	0.57244
(16 or 17)-methylstearate (a19:0 or i19:0)	-0.175567	0.0720648	0.57244
glycerol 3-phosphate	-1.16689	0.0726102	0.57244
X - 18899	-0.616299	0.0742805	0.57244
choline	-0.440554	0.0748268	0.57244
UDP-glucuronate	0.803304	0.0753686	0.57244
threonine	0.132875	0.0780697	0.57244
X - 11308	-0.552422	0.0786304	0.57244
X - 24309	-0.312897	0.0788858	0.57244
docosapentaenoate (n6 DPA; 22:5n6)	-0.73813	0.0795091	0.57244
10-nonadecenoate (19:1n9)	-0.358303	0.0814785	0.57244
myristoleate (14:1n5)	-0.175467	0.0837147	0.57244
carnosine	-0.277379	0.0843179	0.57244
13-HODE + 9-HODE	-0.980841	0.0845595	0.57244
arachidonate (20:4n6)	-0.725727	0.0846909	0.57244
2-hydroxyoctanoate	-0.234176	0.0848389	0.57244
X - 16394	-0.44622	0.0854737	0.57244
isovalerylglycine	-0.223477	0.0858187	0.57244
X - 12798	-0.483258	0.0859966	0.57244
alpha-ketoglutaramate*	-0.233315	0.0883084	0.572749
cis-4-decenoylcarnitine (C10:1)	0.625556	0.0899538	0.572749
nonadecanoate (19:0)	-0.167645	0.0903603	0.572749
2-hydroxypalmitate	-0.273407	0.0907643	0.572749
heme	-0.512423	0.0914207	0.572749
linoleoyl ethanolamide	-0.779453	0.094733	0.574099
pyruvate	-0.924762	0.0949627	0.574099
X - 22806	-0.36798	0.0962956	0.574099
deoxycarnitine	-0.252473	0.097232	0.574099
homocitrulline	-0.591686	0.0988901	0.574099
3-hydroxyhexanoylcarnitine (1)	0.593044	0.0993851	0.574099
4-methyl-2-oxopentanoate	-0.272913	0.100049	0.574099
4-allylphenol sulfate	-1.07133	0.101355	0.574099
valerylglycine	-0.194041	0.102064	0.574099
3-hydroxystearate	-0.136057	0.102417	0.574099
nicotinamide adenine dinucleotide (NAD+)	-0.214968	0.104017	0.576994
alpha-hydroxycaproate	-0.479397	0.107782	0.582605
X - 11299	-1.56906	0.107991	0.582605
4-vinylphenol sulfate	1.02946	0.111149	0.582605
hexadecatrienoate (16:3n3)	-0.518685	0.112132	0.582605
p-cresol sulfate	-0.678498	0.112574	0.582605
X - 24952	-0.233791	0.112869	0.582605
docosapentaenoate (n3 DPA; 22:5n3)	-0.628211	0.116196	0.582605
taurolithocholate 3-sulfate	-1.04976	0.116701	0.582605
1-oleoyl-GPG (18:1)*	-0.436919	0.117059	0.582605
X - 14904	-1.11231	0.117295	0.582605
tiglylcarnitine (C5:1-DC)	-0.811015	0.117397	0.582605
piperine	-1.59824	0.119156	0.582605
ophthalmate	-0.535716	0.120249	0.582605
AICA ribonucleotide	0.418889	0.120345	0.582605
3-methylhistidine	-1.17672	0.122366	0.58705
cysteine-glutathione disulfide	0.51693	0.123551	0.587446
1-arachidonoyl-GPE (20:4n6)*	-0.246475	0.124908	0.587707
X - 23240	-0.258316	0.125813	0.587707
X - 23196	-0.454806	0.127618	0.590954
X - 13007	-1.02339	0.129114	0.591889
X - 12216	-0.485294	0.130043	0.591889
glycerate	-0.223867	0.13532	0.601686
alpha-hydroxyisovalerate	-0.297758	0.136129	0.601686
X - 21319	-0.391433	0.138952	0.601686
X - 24369	-0.630601	0.13912	0.601686
trans-nonadecenoate (tr 19:1)*	-0.291174	0.139904	0.601686
3-formylindole	-0.608367	0.140066	0.601686
phosphoenolpyruvate (PEP)	-0.713266	0.143822	0.601686
pentadecanoate (15:0)	-0.0828071	0.144106	0.601686
N-acetyl-isoputreanine*	-0.41416	0.147092	0.601686
propionylcarnitine (C3)	-0.410984	0.147468	0.601686
X - 11580	-0.587834	0.148035	0.601686
N-acetylisoleucine	-0.419798	0.148374	0.601686
X - 21891	0.498495	0.148424	0.601686
taurocholate	-1.4603	0.150194	0.601686
5-methyluridine (ribothymidine)	-0.2613	0.15081	0.601686
palmitoleate (16:1n7)	-0.366876	0.151306	0.601686
X - 15375	0.334999	0.151404	0.601686
adrenate (22:4n6)	-1.06958	0.153543	0.602637
dihomo-linolenate (20:3n3 or n6)	-0.463084	0.153906	0.602637
X - 12329	-1.08149	0.160912	0.620864
deoxycholate	-0.549382	0.162174	0.620864
X - 22415	0.877202	0.162632	0.620864
N-acetyltryptophan	-0.441314	0.163575	0.620864
1,2,3-benzenetriol sulfate (2)	-0.838261	0.164391	0.620864
Isobar: glucose, fructose, mannose, galactose, etc.	-0.314908	0.168627	0.63238
stachydrine	-0.732541	0.172899	0.636954
thiamin diphosphate	0.459022	0.174003	0.636954
beta-hydroxyisovalerate	-0.575648	0.174119	0.636954
tetradecadienoate (14:2)*	-0.542295	0.174631	0.636954
glycylvaline	-0.716397	0.176111	0.63798
eicosenoate (20:1)	-0.358135	0.178039	0.638232
X - 13743	0.587705	0.178577	0.638232
guanine	0.497271	0.1813	0.642571
arachidate (20:0)	0.140313	0.18228	0.642571
3-methyl-2-oxovalerate	-0.271587	0.183523	0.642571
guaiacol sulfate	-0.688784	0.185543	0.642571
succinylcarnitine (C4-DC)	-0.311869	0.185825	0.642571
linolenate [alpha or gamma; (18:3n3 or 6)]	-0.487439	0.187204	0.643165
3-methylglutarylcarnitine (1)	-0.397091	0.188626	0.643895
X - 22155	-0.341497	0.190432	0.64592
mead acid (20:3n9)	-0.561932	0.191909	0.646809
oleate/vaccenate (18:1)	-0.3848	0.197581	0.648818
glycodeoxycholate 3-sulfate	0.974922	0.199057	0.648818
histamine	0.169043	0.201451	0.648818
X - 17010	-0.361886	0.201917	0.648818
X - 11843	-1.64637	0.202429	0.648818
Fibrinopeptide A*	-0.668622	0.202713	0.648818
N-methylproline	-0.969282	0.20272	0.648818
5-oxoproline	-0.314503	0.203573	0.648818
X - 13871	-0.468608	0.205275	0.648818
palmitoyl ethanolamide	-0.531753	0.20599	0.648818
succinate	-0.592265	0.206042	0.648818
2-oleoylglycerol (18:1)	-0.653707	0.207125	0.648818
X - 11805	-1.28316	0.208641	0.649745
cis-4-decenoate (10:1n6)*	-0.31075	0.210994	0.650515
gamma-glutamylvaline	1.32626	0.211379	0.650515
N-oleoyltaurine	-0.18126	0.214688	0.650515
N,N,N-trimethyl-5-aminovalerate	-0.366219	0.214962	0.650515
X - 22517	-0.478864	0.214997	0.650515
myristate (14:0)	-0.0932742	0.216813	0.652305
perfluorooctanesulfonate (PFOS)	-1.00376	0.218724	0.653678
3-carboxy-4-methyl-5-pentyl-2-furanpropionate (3-CMPFP)**	-0.450091	0.220509	0.653678
N-acetylglycine	-0.195446	0.220952	0.653678
2-methylmalonylcarnitine (C4-DC)	-0.316623	0.224588	0.659172
flavin adenine dinucleotide (FAD)	-0.217013	0.227912	0.659172
X - 15562	1.33872	0.228933	0.659172
phosphopantetheine	-0.529683	0.229785	0.659172
dodecenedioate (C12:1-DC)*	-0.293581	0.230294	0.659172
caffeine	-1.01902	0.230459	0.659172
saccharopine	0.876645	0.232618	0.659172
X - 24748	-0.483455	0.234051	0.659172
N-acetylthreonine	-0.198217	0.235372	0.659172
pyridoxal phosphate	-0.524578	0.235548	0.659172
1-oleoyl-GPE (18:1)	-0.232791	0.236995	0.659172
2-stearoyl-GPE (18:0)*	-0.30575	0.238263	0.659172
5alpha-androstan-3beta,17beta-diol disulfate	-0.940485	0.241294	0.659172
phenylacetylglutamate	-0.358035	0.243388	0.659172
S-methylcysteine	0.31964	0.244357	0.659172
valylleucine	-0.332203	0.247397	0.659172
X - 18921	-0.818543	0.247401	0.659172
X - 15678	-0.46605	0.247735	0.659172
2-palmitoylglycerol (16:0)	0.284014	0.248892	0.659172
1-arachidonoyl-GPC (20:4n6)*	-0.452275	0.250239	0.659172
dihydroxyacetone phosphate (DHAP)	-0.303884	0.25161	0.659172
X - 17299	-0.304341	0.251948	0.659172
adenosine 2'-monophosphate (2'-AMP)	-1.13192	0.252145	0.659172
androstenediol (3beta,17beta) disulfate (2)	-0.415054	0.252865	0.659172
isovalerate (i5:0)	-0.13517	0.254132	0.659172
3-methylglutarylcarnitine (2)	-0.550721	0.254993	0.659172
spermine	-1.03874	0.256836	0.66073
6-oxopiperidine-2-carboxylate	-0.461157	0.259215	0.663643
X - 21353	-0.266622	0.261011	0.665045
2-hydroxystearate	-0.0668805	0.264242	0.668786
phenylalanylglycine	0.363485	0.266262	0.668786
pyroglutamylleucine*	-0.759897	0.26649	0.668786
cyclo(gly-pro)	-1.00938	0.268618	0.668786
(12 or 13)-methylmyristate (a15:0 or i15:0)	-0.117842	0.268758	0.668786
tryptophan betaine	-0.26379	0.27179	0.671144
1-palmitoyl-GPC (16:0)	-0.419905	0.272227	0.671144
butyrylcarnitine (C4)	-0.554175	0.276199	0.676225
X - 15680	0.489268	0.277828	0.676225
1-oleoylglycerol (18:1)	-0.443378	0.278097	0.676225
caprate (10:0)	-0.306953	0.279823	0.677329
X - 22776	-0.284923	0.281756	0.678921
C-glycosyltryptophan	0.300916	0.283209	0.679349
taurodeoxycholate	-0.860261	0.284796	0.680093
Fibrinopeptide B (1-9)**	-0.866034	0.288049	0.68479
1-carboxyethylphenylalanine	-0.762427	0.29027	0.686056
1-arachidonoyl-GPI (20:4)*	-0.251457	0.291158	0.686056
methionine sulfone	-0.451357	0.292546	0.686288
palmitate (16:0)	-0.143482	0.296087	0.689263
hypotaurine	0.566276	0.298361	0.689263
glutamate	0.2073	0.298873	0.689263
X - 13835	-0.737632	0.298991	0.689263
1-carboxyethylleucine	-0.511194	0.300408	0.689544
homoarginine	0.405645	0.303372	0.692727
valine	-0.207516	0.304396	0.692727
alpha-hydroxyisocaproate	-0.185347	0.313132	0.707269
4-nitrophenol	0.104597	0.314441	0.707269
X - 17138	0.576875	0.316068	0.707269
margarate (17:0)	-0.062343	0.316587	0.707269
7-hydroxycholesterol (alpha or beta)	-0.478511	0.317427	0.707269
X - 23537	-0.22802	0.320039	0.709435
acetylcarnitine (C2)	-0.30712	0.321064	0.709435
X - 11381	-0.277941	0.32366	0.710189
kynurenate	-0.489879	0.324608	0.710189
N-acetyltaurine	-0.402403	0.32608	0.710189
X - 21470	-0.12124	0.326739	0.710189
isovalerylcarnitine (C5)	-0.738458	0.33089	0.716288
glutaminylleucine	-0.294649	0.334404	0.719022
N6-acetyllysine	-0.353059	0.334854	0.719022
1-stearoyl-GPI (18:0)	-0.204618	0.336901	0.720076
phosphate	-0.184414	0.338917	0.720076
X - 21729	-0.24697	0.339401	0.720076
glycylisoleucine	-0.258316	0.341411	0.721466
caproate (6:0)	-0.125128	0.343914	0.722465
trans-4-hydroxyproline	0.143852	0.344597	0.722465
phenylalanylalanine	-0.134053	0.34813	0.723118
dodecadienoate (12:2)*	-0.0976646	0.349315	0.723118
indolepropionate	0.537313	0.351425	0.723118
dihomo-linoleate (20:2n6)	-0.260787	0.352162	0.723118
X - 11880	-0.627759	0.353759	0.723118
X - 21453	-0.301551	0.353896	0.723118
dopamine 3-O-sulfate	0.722194	0.354872	0.723118
serine	0.352551	0.355772	0.723118
4-hydroxy-nonenal-glutathione	-0.873315	0.361193	0.726744
X - 15161	0.314418	0.361864	0.726744
glycocholate	-0.422358	0.362862	0.726744
X - 15563	0.559314	0.363015	0.726744
X - 21457	-0.245523	0.36471	0.727402
thymol sulfate	-1.07845	0.369306	0.732
4-guanidinobutanoate	-0.208473	0.369764	0.732
tryptophan	-0.276014	0.375064	0.735846
taurine	0.15882	0.375605	0.735846
maltotetraose	-0.507166	0.375852	0.735846
3-(4-hydroxyphenyl)lactate	-0.211474	0.379267	0.738224
uridine	-0.139782	0.37984	0.738224
cytidine 5'-diphosphocholine	-0.789684	0.3839	0.743402
pseudouridine	-0.127939	0.386295	0.744988
X - 14056	-0.657322	0.387517	0.744988
S-methylglutathione	-0.198399	0.392833	0.752492
X - 10457	-0.214274	0.396498	0.75679
pantothenate	-0.161887	0.400441	0.761213
N1-Methyl-4-pyridone-3-carboxamide	-0.342303	0.40272	0.761213
X - 11478	0.0952016	0.40385	0.761213
cholate	-1.053	0.404533	0.761213
X - 22154	0.226873	0.407439	0.763204
Fibrinopeptide A, des-ala(1)*	0.663788	0.410591	0.763204
ergothioneine	-0.254654	0.412256	0.763204
leucylglycine	-0.153411	0.41457	0.763204
1-linoleoyl-GPE (18:2)*	-0.110963	0.41606	0.763204
X - 24375	-0.27924	0.417673	0.763204
4-hydroxybenzoate	-0.232405	0.419151	0.763204
adenosine 5'-diphosphate (ADP)	-0.437563	0.419923	0.763204
X - 10445	0.247272	0.42002	0.763204
X - 14352	-0.178847	0.420824	0.763204
X - 11850	-1.1222	0.421356	0.763204
tyrosylglycine	0.128448	0.429664	0.766709
androstenediol (3beta,17beta) disulfate (1)	-0.388314	0.42977	0.766709
acetyl CoA	-0.475595	0.430763	0.766709
catechol sulfate	-0.433526	0.431247	0.766709
3-carboxy-4-methyl-5-propyl-2-furanpropanoate (CMPF)	-0.711899	0.432166	0.766709
X - 21796	-0.133433	0.433858	0.766709
hexadecanedioate (C16-DC)	-0.133391	0.434745	0.766709
erucamide	-0.48837	0.43666	0.766709
1,7-dimethylurate	-0.414299	0.442936	0.766709
carnitine	-0.111973	0.447013	0.766709
adenosine 3',5'-diphosphate	-0.235907	0.447483	0.766709
phosphoethanolamine	0.233696	0.448287	0.766709
Fibrinopeptide B (1-12)**	-0.382782	0.449745	0.766709
pregnenolone sulfate	-0.285938	0.452417	0.766709
caprylate (8:0)	-0.212399	0.453054	0.766709
uridine 5'-monophosphate (UMP)	0.487019	0.454619	0.766709
glycylleucine	-0.187497	0.455907	0.766709
X - 11261	0.201787	0.455955	0.766709
inosine 5'-monophosphate (IMP)	-0.16502	0.46145	0.766709
X - 11470	-0.486952	0.463535	0.766709
N-methylpipecolate	0.338639	0.465206	0.766709
argininate*	-0.210056	0.468926	0.766709
X - 18371	0.244692	0.468979	0.766709
7-methylxanthine	-0.619301	0.472252	0.766709
isobutyrylcarnitine (C4)	-0.537948	0.473078	0.766709
2-aminooctanoate	-0.302214	0.473177	0.766709
paraxanthine	-0.595214	0.476498	0.766709
1-linoleoylglycerol (18:2)	-0.317127	0.478436	0.766709
theobromine	-0.727376	0.478749	0.766709
3-hydroxyhexanoate	-0.14557	0.479259	0.766709
4-ethylphenylsulfate	0.56902	0.479694	0.766709
2-palmitoyl-GPC (16:0)*	-0.169706	0.480737	0.766709
androsterone sulfate	-0.344146	0.481088	0.766709
X - 22772	0.20029	0.481443	0.766709
adenosine 5'-diphosphoribose (ADP-ribose)	0.29433	0.482064	0.766709
phenylalanine	-0.155383	0.482395	0.766709
1-linoleoyl-GPI (18:2)*	-0.173696	0.483621	0.766709
threonylphenylalanine	-0.298249	0.485169	0.766709
benzoate	-0.0709775	0.486887	0.766709
taurocholenate sulfate*	-0.33028	0.491977	0.766709
3'-dephosphocoenzyme A	-0.247957	0.492814	0.766709
ribose/ribulose/xylulose/arabinose 5-phosphate	-0.126274	0.493433	0.766709
X - 12953	0.431988	0.49493	0.766709
guanosine	0.386936	0.495381	0.766709
linoleoylcarnitine (C18:2)*	-0.28848	0.496297	0.766709
N-stearoyltaurine	0.25072	0.496671	0.766709
methyl-4-hydroxybenzoate	-0.636648	0.497616	0.766709
hydroxy-CMPF*	-0.454186	0.499364	0.766709
creatine	-0.0985142	0.499507	0.766709
salicylate	0.612393	0.499796	0.766709
S-lactoylglutathione	-0.607927	0.500241	0.766709
1-oleoyl-GPI (18:1)*	-0.290629	0.500895	0.766709
2-aminoheptanoate	-0.203988	0.500967	0.766709
4-methylbenzenesulfonate	-0.374328	0.504364	0.766709
glutamate, gamma-methyl ester	0.721465	0.504752	0.766709
X - 17269	-0.140499	0.50541	0.766709
3-hydroxybutyrylcarnitine (2)	-0.470923	0.506291	0.766709
X - 16932	0.15407	0.509896	0.766709
phenylacetylglutamine	-0.437523	0.510495	0.766709
2-stearoyl-GPC (18:0)*	-0.351985	0.510863	0.766709
valylglycine	0.154648	0.513306	0.766709
trigonelline (N'-methylnicotinate)	-0.22725	0.514319	0.766709
5-methylthioadenosine (MTA)	-0.140539	0.515438	0.766709
3-hydroxybutyrylcarnitine (1)	0.283543	0.517413	0.766709
leucylalanine	-0.278322	0.518017	0.766709
X - 17185	0.644331	0.518316	0.766709
X - 15220	0.219625	0.521601	0.767992
pyridoxate	-0.287786	0.522068	0.767992
lactate	-0.174168	0.528129	0.768943
X - 12115	-0.189088	0.528905	0.768943
1-stearoyl-GPC (18:0)	-0.172655	0.529476	0.768943
glycodeoxycholate	-0.459217	0.529549	0.768943
O-sulfo-L-tyrosine	0.191572	0.530873	0.768943
Fibrinopeptide A (5-16)*	0.484731	0.531378	0.768943
2-hydroxyheptanoate*	-0.109834	0.534775	0.769784
pyrraline	-0.19527	0.537439	0.769784
dehydroascorbate	0.397249	0.537608	0.769784
hippurate	-0.395164	0.540643	0.769784
taurocyamine	-0.186611	0.541009	0.769784
X - 12100	-0.173393	0.542269	0.769784
asparagine	0.240687	0.543047	0.769784
adenosine 3'-monophosphate (3'-AMP)	-0.65554	0.543523	0.769784
maltotriose	-0.387928	0.545921	0.771129
glycerophosphoinositol*	-0.580256	0.548969	0.773382
X - 12425	-0.259269	0.552586	0.773589
N-acetylarginine	-0.167756	0.553579	0.773589
1-palmitoyl-GPE (16:0)	-0.248743	0.557488	0.773589
docosatrienoate (22:3n3)	0.214092	0.557712	0.773589
glycochenodeoxycholate 3-sulfate	0.397453	0.558392	0.773589
citrulline	-0.153608	0.558827	0.773589
glutathione, oxidized (GSSG)	-0.221831	0.559284	0.773589
urate	-0.110227	0.561871	0.775154
adenosine 3',5'-cyclic monophosphate (cAMP)	-0.07961	0.568863	0.777744
glycochenodeoxycholate	-0.270038	0.570895	0.777744
N1-methyladenosine	-0.0962602	0.571049	0.777744
adenosine 5'-monophosphate (AMP)	0.350114	0.572795	0.777744
HWESASXX*	-0.749256	0.573895	0.777744
pyroglutamylisoleucine*	0.344278	0.574892	0.777744
1-linoleoyl-GPC (18:2)	-0.22821	0.576345	0.777744
epsilon-caprolactam	-0.0678678	0.580519	0.777744
X - 24813	0.116163	0.580872	0.777744
1-arachidonylglycerol (20:4)	0.529057	0.582705	0.777744
nicotinate	-0.122258	0.583266	0.777744
3-indoxyl sulfate	-0.177182	0.583873	0.777744
oleoylcarnitine (C18:1)	0.228336	0.584108	0.777744
N-formylmethionine	-0.100096	0.584195	0.777744
N-acetylalanine	-0.154949	0.587251	0.779862
phenol sulfate	-0.367055	0.591014	0.782908
inosine	-0.22122	0.593154	0.783793
leucine	-0.107187	0.595331	0.784274
alpha-glutamylisoleucine*	-0.142256	0.59782	0.784274
S-adenosylmethionine (SAM)	-0.197153	0.597937	0.784274
docosadienoate (22:2n6)	-0.160991	0.600385	0.78555
3-hydroxyindolin-2-one	0.225837	0.604004	0.787657
hexanoylcarnitine (C6)	-0.242793	0.604953	0.787657
stearoylcarnitine (C18)	-0.190549	0.607942	0.789618
X - 21342	0.106335	0.611285	0.792029
guanosine 3'-monophosphate (3'-GMP)	0.745295	0.61807	0.797109
X - 11372	-0.244444	0.619445	0.797109
maltopentaose	-0.328616	0.621483	0.797109
acisoga	0.164035	0.622032	0.797109
chenodeoxycholate	-0.293962	0.622717	0.797109
X - 16576	0.487554	0.625546	0.797109
X - 12234	0.221203	0.625685	0.797109
X - 12689	0.258108	0.627497	0.79751
alanine	-0.0560861	0.629976	0.798754
isoleucylglycine	-0.120682	0.63383	0.801732
biliverdin	0.331335	0.637289	0.802411
X - 16129	0.480375	0.63738	0.802411
3-hydroxyoleate*	0.183648	0.639719	0.802795
1-methylxanthine	-0.376276	0.640704	0.802795
epiandrosterone sulfate	-0.190478	0.643312	0.802795
X - 12007	0.331562	0.643715	0.802795
X - 15664	-0.182496	0.647104	0.805136
X - 14380	0.334893	0.650425	0.806508
cytidine 5'-monophosphate (5'-CMP)	-0.141885	0.652563	0.806508
X - 22518	0.595943	0.652751	0.806508
N-acetylglutamine	-0.143408	0.655429	0.807942
androsterone glucuronide	-0.45587	0.659221	0.808415
X - 22519	0.251037	0.660558	0.808415
Fibrinopeptide A, phosphono-ser(3)*	0.26973	0.66297	0.808415
X - 15136	-0.111242	0.66409	0.808415
N1-methylguanosine	-0.0984291	0.664849	0.808415
X - 11787	-0.128301	0.665002	0.808415
X - 18345	0.112294	0.666439	0.808415
N-acetylmethionine	0.0831357	0.670301	0.811252
glutathione, reduced (GSH)	0.0968999	0.673372	0.81312
3-methoxytyrosine	-0.0825747	0.675972	0.814414
laurylcarnitine (C12)	-0.185673	0.678146	0.81508
X - 12104	0.131237	0.6803	0.81508
valylglutamine	-0.116821	0.681342	0.81508
glutarylcarnitine (C5-DC)	-0.205324	0.682647	0.81508
X - 11444	-0.15851	0.68644	0.815849
2-aminoadipate	0.203051	0.686912	0.815849
alanylleucine	-0.10318	0.687887	0.815849
coenzyme A	0.135313	0.693439	0.820606
alpha-hydroxyisovaleroyl carnitine*	0.0513701	0.695957	0.821759
2-aminophenol sulfate	-0.173303	0.704649	0.822583
palmitamide (16:0)	-0.147567	0.70536	0.822583
X - 13658	0.038333	0.707929	0.822583
1-myristoylglycerol (14:0)	0.10299	0.710546	0.822583
3,4-methyleneheptanoylcarnitine	0.178582	0.712122	0.822583
3-methyl-2-oxobutyrate	0.0845822	0.713671	0.822583
X - 22507	-0.3894	0.713674	0.822583
tetradecanedioate (C14-DC)	0.0411241	0.713971	0.822583
N-delta-acetylornithine	-0.120847	0.714395	0.822583
myristoylcarnitine (C14)	-0.195151	0.714643	0.822583
4-methylcatechol sulfate	0.246508	0.714702	0.822583
X - 11315	-0.0918052	0.715429	0.822583
X - 12096	0.245241	0.716736	0.822583
nicotinamide	-0.0696693	0.721682	0.825089
linoleamide (18:2n6)	-0.265087	0.722078	0.825089
X - 17717	0.107367	0.723568	0.825089
gamma-glutamylleucine	0.144674	0.726743	0.826939
N-(2-furoyl)glycine	0.322833	0.728978	0.827714
N4-acetylcytidine	-0.0675527	0.73069	0.827893
aspartate	0.0912911	0.740034	0.835733
butyrylglycine	-0.107556	0.742302	0.835733
X - 12206	0.131815	0.744777	0.835733
isoleucine	-0.0865179	0.749104	0.835733
gamma-glutamylglutamine	0.155076	0.749261	0.835733
palmitoylcarnitine (C16)	-0.108463	0.750689	0.835733
X - 21607	-0.14605	0.750802	0.835733
X - 14318	-0.0701806	0.751809	0.835733
creatinine	-0.0445146	0.753657	0.835733
X - 15168	-0.0737181	0.756683	0.835733
N6-succinyladenosine	-0.0764832	0.757718	0.835733
octanoylcarnitine (C8)	0.12032	0.758051	0.835733
N-methylhydroxyproline**	-0.374673	0.760276	0.835733
pyroglutamine*	-0.0707989	0.76352	0.835733
X - 24948	0.144555	0.763925	0.835733
azelate (C9-DC)	-0.0311512	0.765178	0.835733
7-alpha-hydroxy-3-oxo-4-cholestenoate (7-Hoca)	0.076614	0.766854	0.835733
hypoxanthine	-0.0654344	0.767216	0.835733
2-methylbutyrylcarnitine (C5)	-0.105052	0.768405	0.835733
7-methylguanine	-0.082301	0.769422	0.835733
androstenediol (3beta,17beta) monosulfate (2)	-0.195711	0.771507	0.835733
oleamide	-0.313115	0.772996	0.835733
methyl-4-hydroxybenzoate sulfate	-0.346636	0.773705	0.835733
X - 13553	0.154405	0.778546	0.839259
gamma-glutamylglutamate	-0.205641	0.780539	0.839391
X - 24972	-0.115154	0.782365	0.839391
sphingosine	0.0782771	0.783397	0.839391
p-cresol glucuronide*	-0.334568	0.788756	0.840512
gamma-glutamyltyrosine	-0.108558	0.789124	0.840512
X - 14193	-0.103791	0.789178	0.840512
1-palmitoleoyl-GPC (16:1)*	-0.16473	0.791971	0.841802
decanoylcarnitine (C10)	0.121456	0.794634	0.842951
histidine	-0.0490304	0.79681	0.843578
X - 15166	0.0884866	0.801464	0.845241
glucuronide of piperine metabolite C17H21NO3 (4)*	0.210509	0.801555	0.845241
betaine	-0.0582936	0.804274	0.846432
creatine phosphate	-0.523537	0.80619	0.846775
1-stearoyl-GPS (18:0)*	-0.0367531	0.808845	0.847805
anserine	-0.0435077	0.813654	0.847805
pelargonate (9:0)	-0.0486856	0.814451	0.847805
imidazole lactate	-0.11154	0.814649	0.847805
1-carboxyethylvaline	-0.0557867	0.817157	0.847805
2-palmitoleoyl-GPC (16:1)*	0.0941648	0.818363	0.847805
X - 24947	-0.285288	0.819077	0.847805
6-phosphogluconate	0.0821993	0.819907	0.847805
kynurenine	-0.0403345	0.824718	0.84838
spermidine	0.0990713	0.826768	0.84838
3-hydroxypyridine sulfate	-0.176385	0.828675	0.84838
X - 21431	-0.267388	0.829886	0.84838
X - 15469	-0.120689	0.829904	0.84838
N2-acetyllysine	-0.0824268	0.830022	0.84838
androstenediol (3beta,17beta) monosulfate (1)	-0.0854687	0.836114	0.852258
1,3-dimethylurate	-0.103885	0.839165	0.852258
N-acetylmethionine sulfoxide	-0.089758	0.839712	0.852258
valerate (5:0)	-0.0473698	0.840423	0.852258
X - 09789	-0.0610126	0.843692	0.852258
X - 11440	0.0749242	0.848608	0.852258
N2,N2-dimethylguanosine	-0.0545053	0.850408	0.852258
cortisol	-0.0810124	0.851658	0.852258
1-palmitoyl-GPA (16:0)	-0.0748138	0.85224	0.852258
arginine	0.0317959	0.852974	0.852258
acesulfame	0.123469	0.854259	0.852258
adenosine	-0.073903	0.855122	0.852258
dehydroisoandrosterone sulfate (DHEA-S)	0.0773013	0.85608	0.852258
gamma-glutamylalanine	-0.116616	0.85783	0.852258
xanthine	0.0166333	0.864059	0.852258
X - 22590	-0.0717974	0.864869	0.852258
N-acetylserine	-0.0624795	0.86589	0.852258
X - 21769	0.0544373	0.866429	0.852258
gamma-glutamylphenylalanine	0.0654966	0.866623	0.852258
X - 22775	-0.037849	0.868035	0.852258
3-hydroxyoctanoate	0.0185611	0.868553	0.852258
malate	-0.0334827	0.869912	0.852258
pregnenediol sulfate (C21H34O5S)*	0.0657688	0.873131	0.852258
theophylline	-0.08793	0.87377	0.852258
1-carboxyethylisoleucine	0.040295	0.873827	0.852258
3-phosphoglycerate	0.144644	0.877451	0.854229
argininosuccinate	0.078781	0.881394	0.856502
3-hydroxyhippurate	-0.143432	0.896055	0.867518
S-nitrosoglutathione (GSNO)	0.0593365	0.897351	0.867518
N6-carbamoylthreonyladenosine	0.0344853	0.899825	0.867518
glycocholenate sulfate*	-0.0702089	0.900592	0.867518
Fibrinopeptide B (1-11)**	-0.0806312	0.901642	0.867518
2-hydroxy-3-methylvalerate	-0.033495	0.902505	0.867518
X - 11407	-0.0751867	0.908609	0.870088
indoleacetate	-0.03168	0.91132	0.870088
3-methyl catechol sulfate (1)	0.0696994	0.913026	0.870088
3-methylxanthine	0.080876	0.914967	0.870088
pipecolate	0.0207302	0.915995	0.870088
methionine	-0.0163798	0.916623	0.870088
X - 12097	-0.0911932	0.918576	0.870088
2-arachidonoylglycerol (20:4)	0.100462	0.91858	0.870088
myo-inositol	0.0308926	0.926178	0.870088
1-oleoyl-GPC (18:1)	0.0308985	0.927827	0.870088
choline phosphate	0.0135577	0.931162	0.870088
1,5-anhydroglucitol (1,5-AG)	-0.0128751	0.931365	0.870088
N-palmitoyltaurine	0.0165809	0.933046	0.870088
uracil	0.0416302	0.938487	0.870088
N6,N6,N6-trimethyllysine	0.0138883	0.940577	0.870088
ornithine	-0.0182907	0.94193	0.870088
S-adenosylhomocysteine (SAH)	-0.0201369	0.942836	0.870088
oxalate (ethanedioate)	0.0118922	0.942916	0.870088
glutamine	0.0209435	0.944684	0.870088
X - 11795	-0.014899	0.946604	0.870088
gamma-glutamylisoleucine*	0.0295534	0.948668	0.870088
indolelactate	-0.0189831	0.953022	0.870088
X - 16124	-0.0878011	0.956561	0.870088
sebacate (C10-DC)	0.00807882	0.957531	0.870088
myristoleoylcarnitine (C14:1)*	-0.0252935	0.959713	0.870088
dimethylarginine (SDMA + ADMA)	0.0126879	0.959803	0.870088
undecanedioate (C11-DC)	0.00628588	0.961185	0.870088
CoA-glutathione*	-0.015866	0.961282	0.870088
stearate (18:0)	0.00616354	0.962219	0.870088
pregnenediol disulfate (C21H34O8S2)*	0.0158145	0.962316	0.870088
quinate	-0.0298029	0.962343	0.870088
2-hydroxyoleate	0.0137232	0.96363	0.870088
1-methylurate	-0.021993	0.965515	0.870088
X - 21628	0.0313495	0.965848	0.870088
oleoyl CoA	0.0166815	0.9662	0.870088
3'-dephospho-CoA-glutathione*	-0.0205262	0.96672	0.870088
docosatrienoate (22:3n6)*	-0.0331015	0.970453	0.870088
proline	-0.00774838	0.970922	0.870088
X - 13728	0.022387	0.973093	0.870088
pro-hydroxy-pro	0.0109683	0.973711	0.870088
glycerophosphoethanolamine	0.00876674	0.973919	0.870088
N-acetylhistidine	0.0126528	0.979604	0.870088
X - 12544	-0.0412502	0.979977	0.870088
lysine	-0.00445787	0.981651	0.870088
6-hydroxyindole sulfate	-0.00719225	0.982328	0.870088
malonylcarnitine	0.00659406	0.983396	0.870088
tyrosine	-0.00589947	0.983574	0.870088
alpha-glutamylleucine*	-0.00313886	0.983606	0.870088
4-acetamidobutanoate	0.00688991	0.986869	0.871276
X - 21477	-0.0069212	0.988221	0.871276
Fibrinopeptide B (1-13)**	0.00434049	0.995318	0.874674
glycolithocholate sulfate*	-0.00355952	0.99536	0.874674
X - 21258	-0.00267169	0.997484	0.875096
